# Supplementary material for: Transcriptome evolution from breast epithelial cells to basal-like tumors
Source: PubMed Central journal article supplement (PMC5787480; doi:10.18632/oncotarget.23065), 2017-12-08
Supplement: oncotarget-09-453-s001.pdf [file oncotarget-09-453-s001.pdf]

# Transcriptome evolution from breast epithelial cells to basal-like tumors

## SUPPLEMENTARY MATERIALS

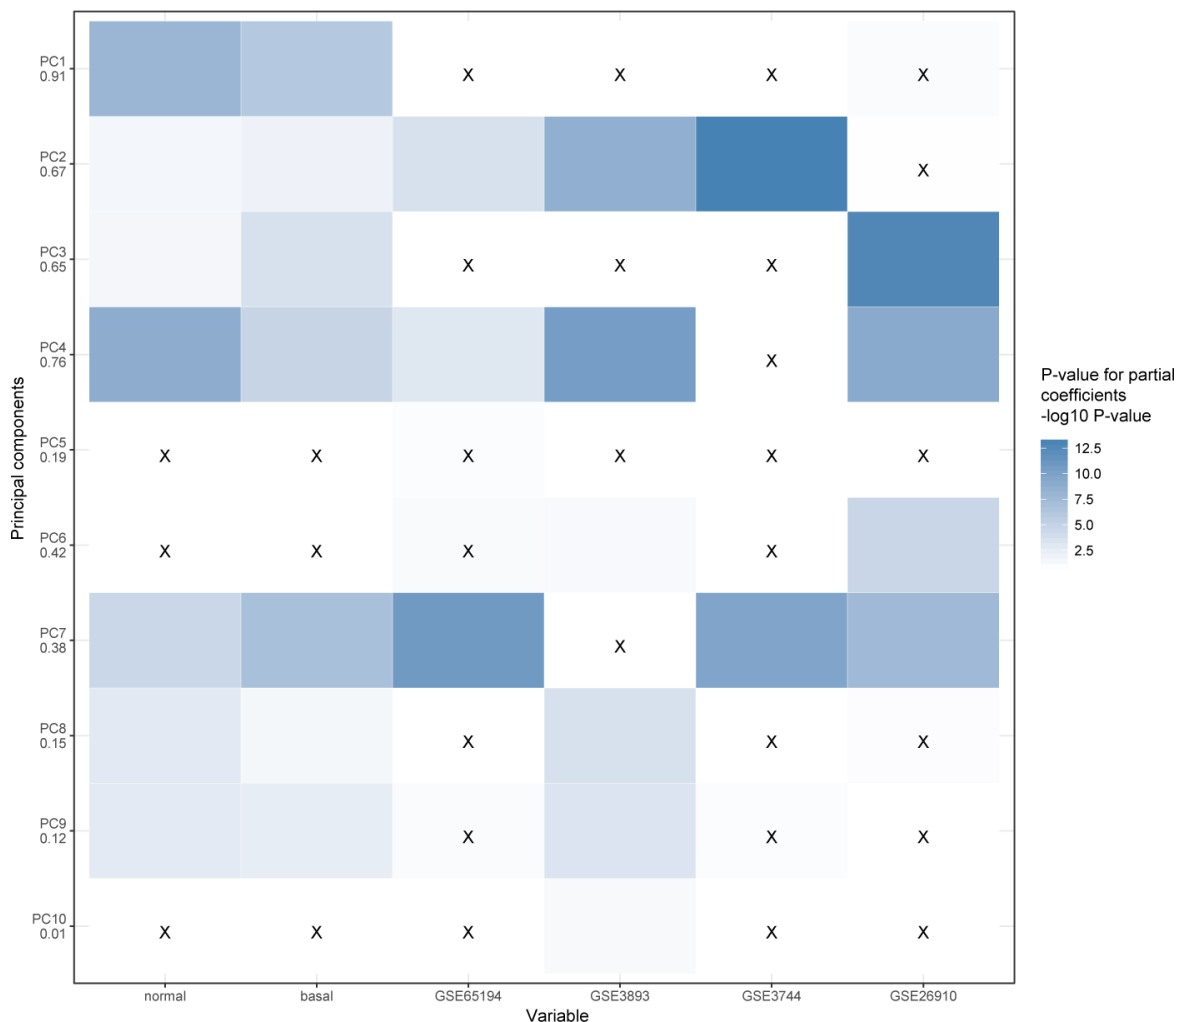

Supplementary Figure 1: Heatmap representation of the  $-\log_{10} P$ -values for the partial coefficients of the multiple linear model of each one of the 10 first principal components, predicted by Disease and Batch variables.

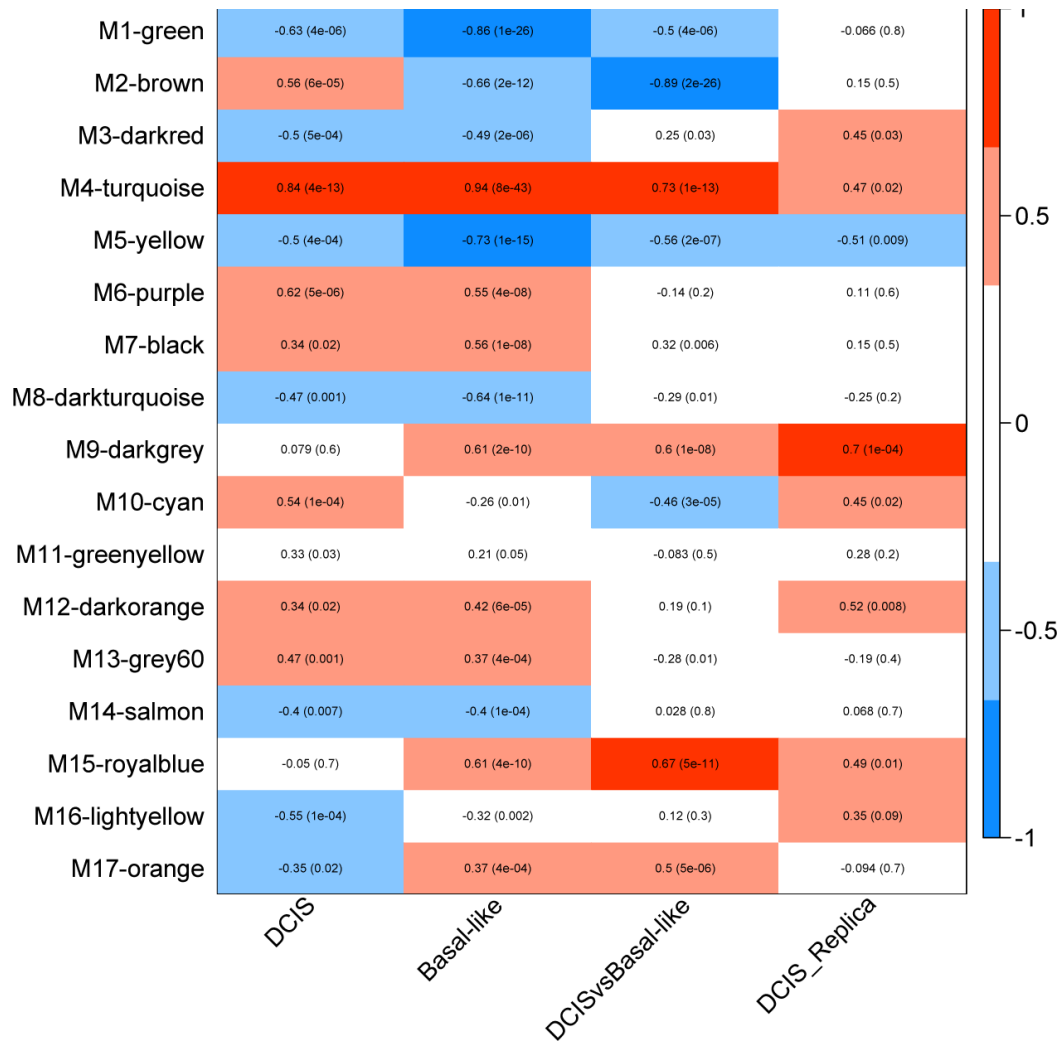

**Supplementary Figure 2: Heatmap showing correlation and *P*-values for each module eigengene and disease categories.** Last column uses module eigengene values from matched genes from another external dataset of DCIS and normal samples.

M7-Black

REVIGO Gene Ontology treemap

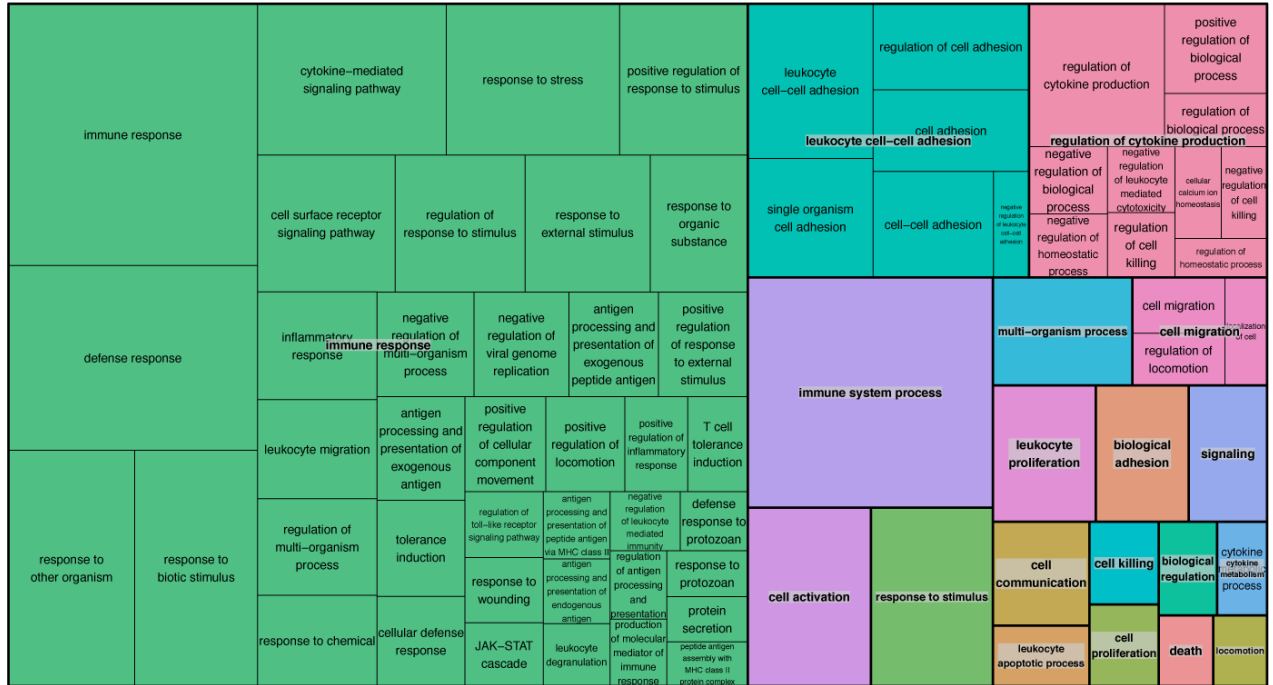

M2-Brown

REVIGO Gene Ontology treemap

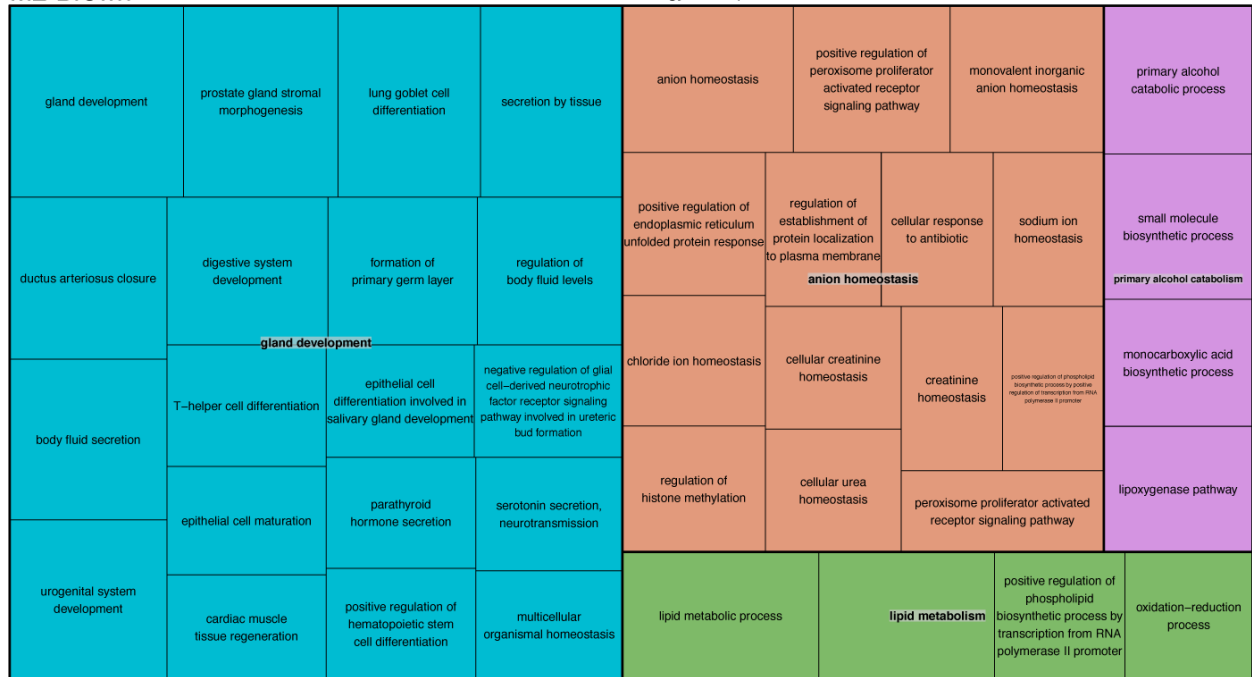

M10-Cyan

REVIGO Gene Ontology treemap

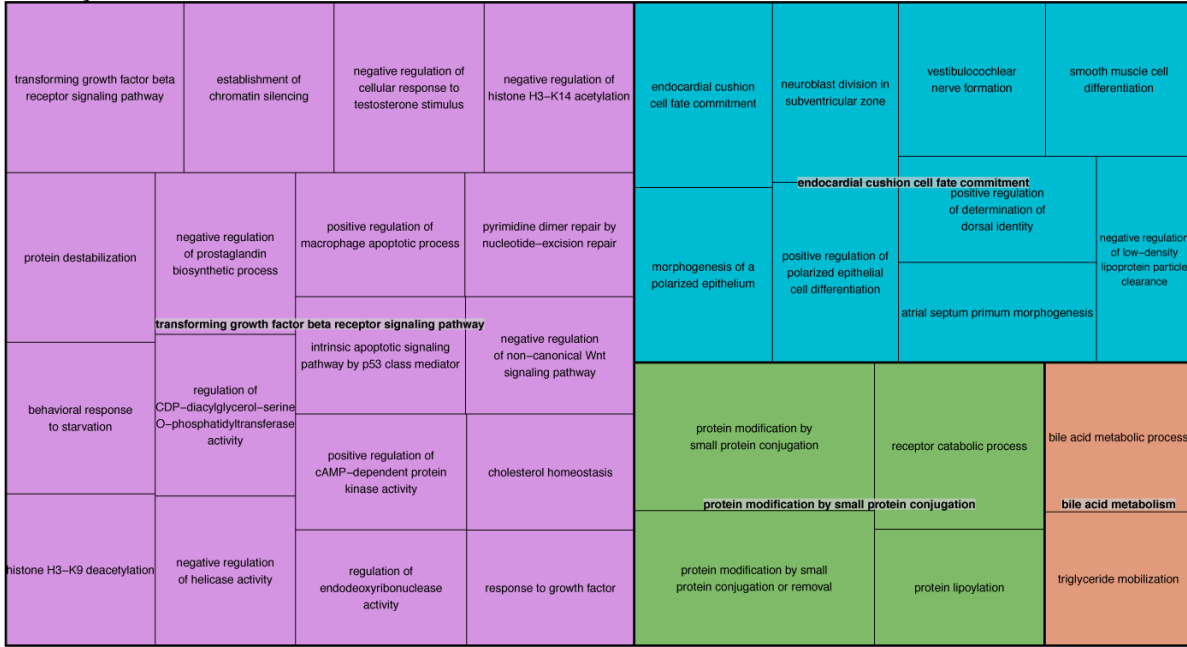

M9-Darkgrey

REVIGO Gene Ontology treemap

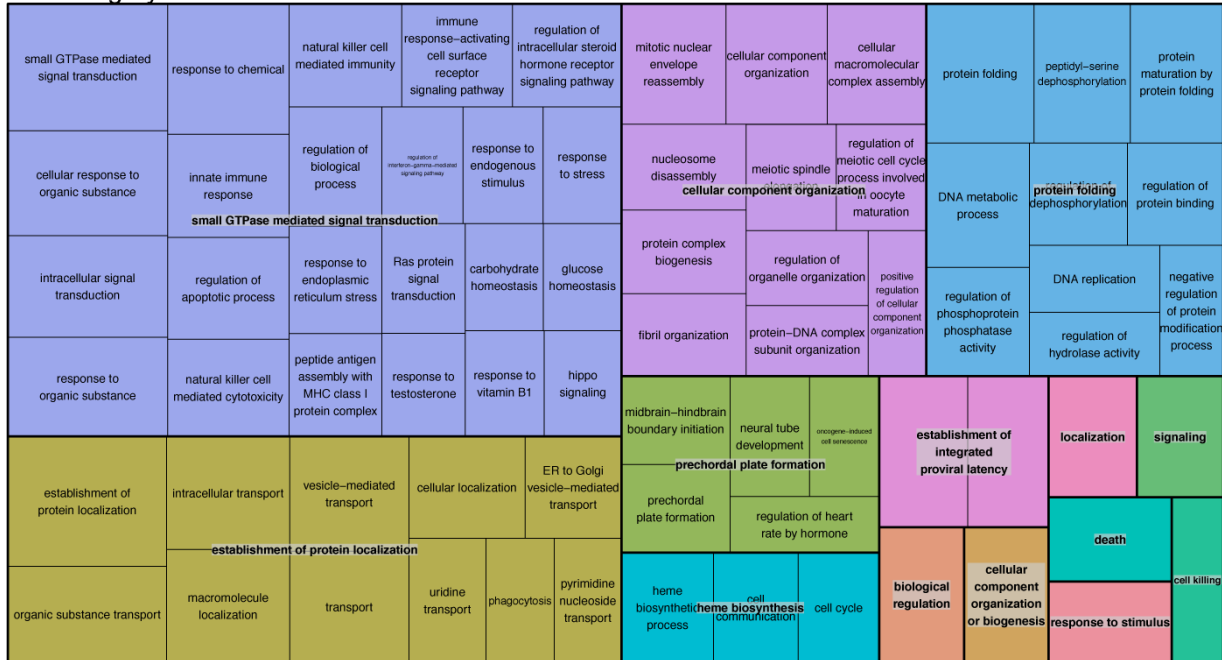

### M12-Darkorange

REVIGO Gene Ontology treemap

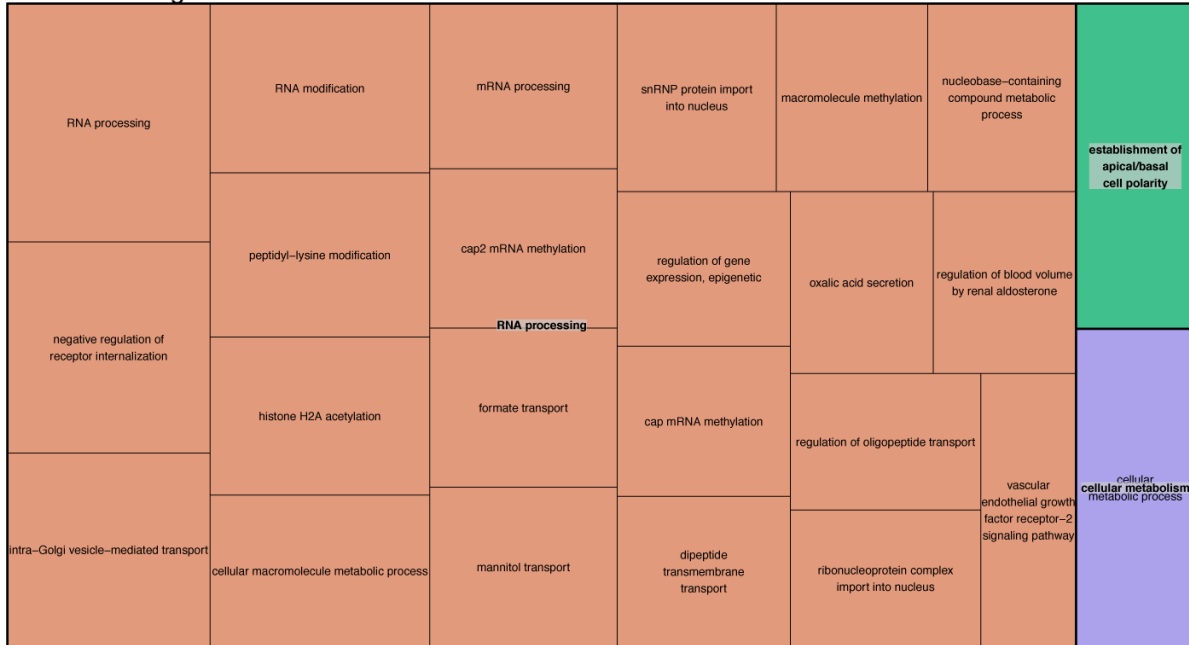

### M3-Darkred

REVIGO Gene Ontology treemap

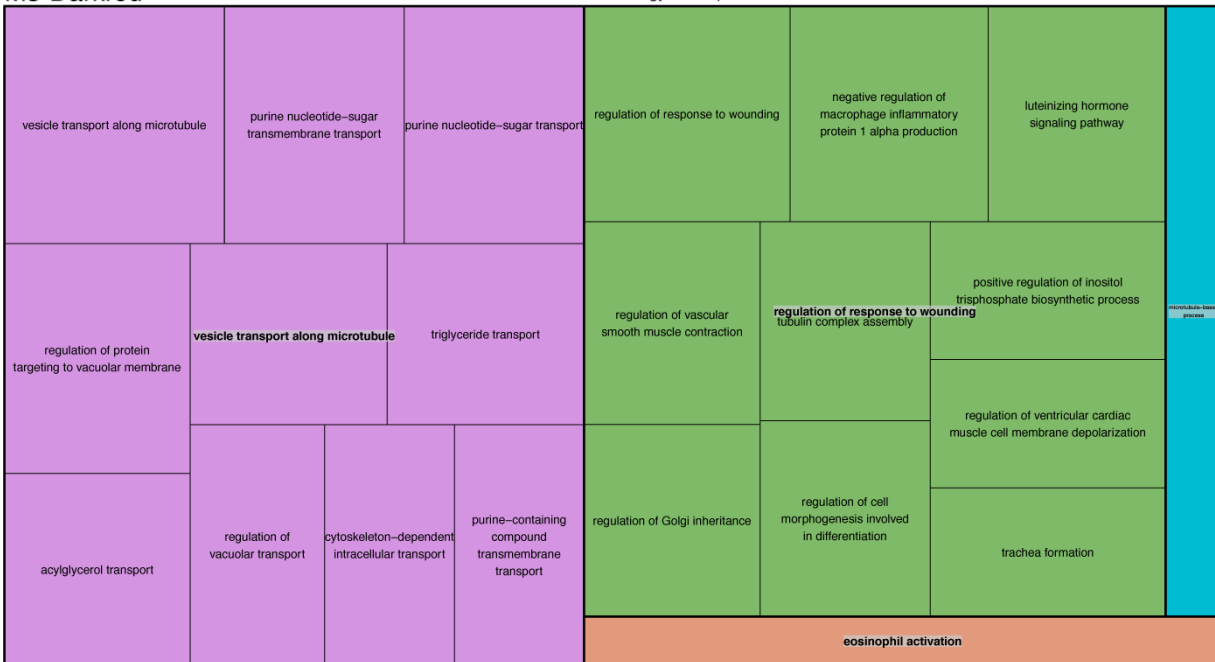

### M8-Darkturquoise

REVIGO Gene Ontology treemap

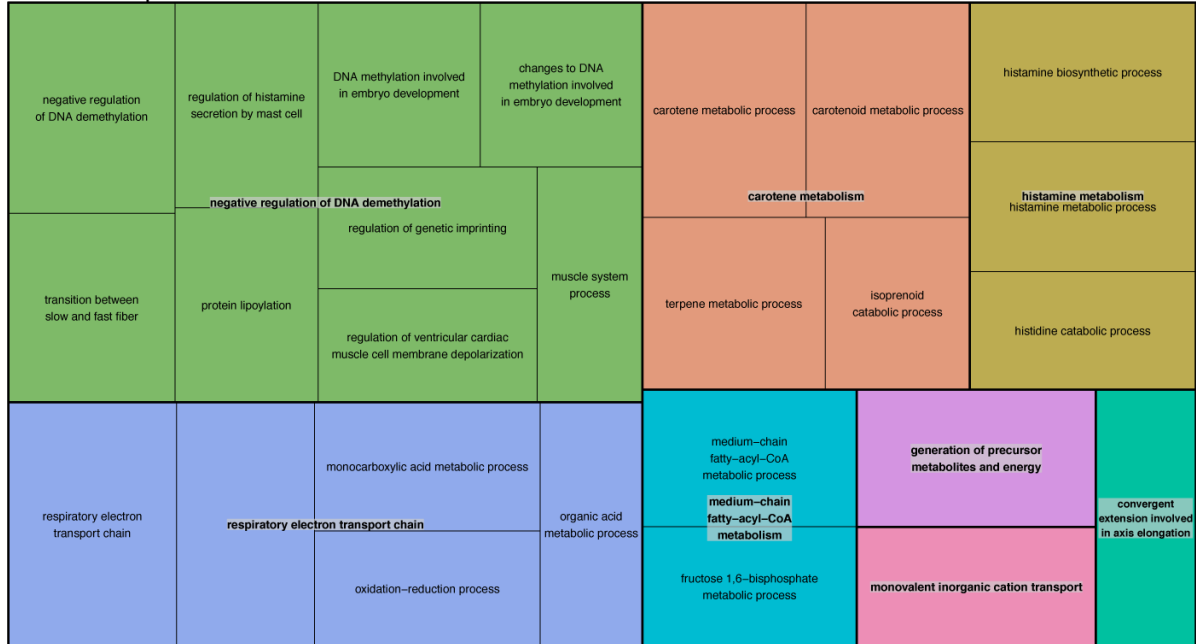

### M1-Green

REVIGO Gene Ontology treemap

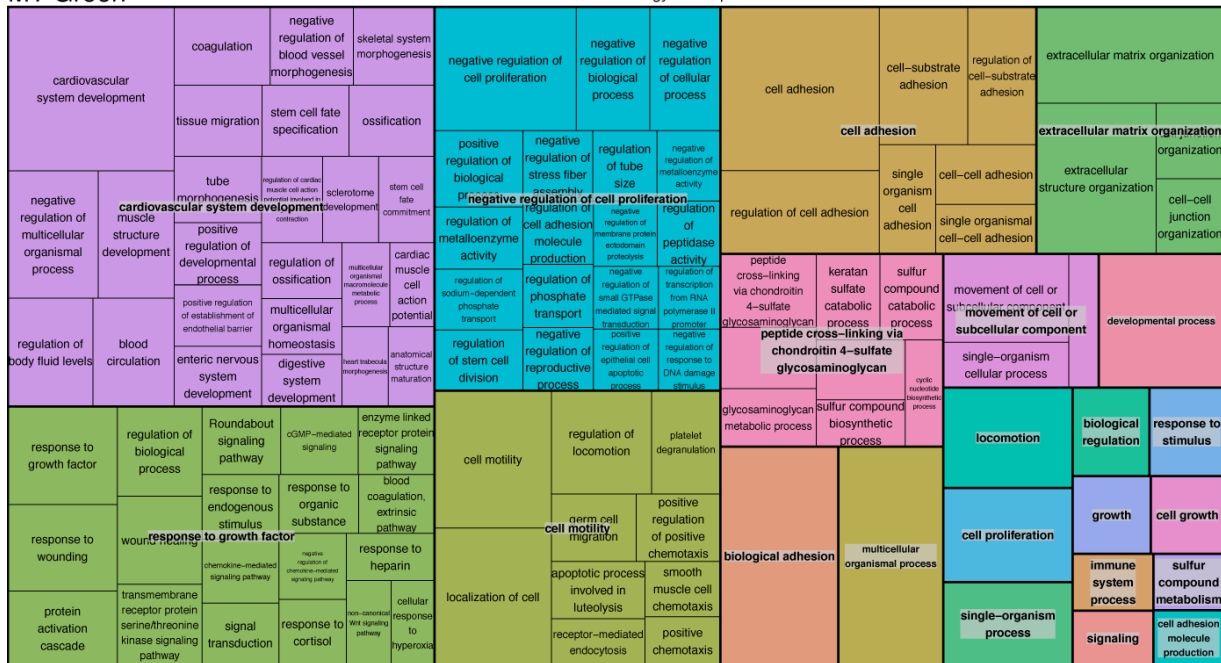

M16-Lightyellow

REVIGO Gene Ontology treemap

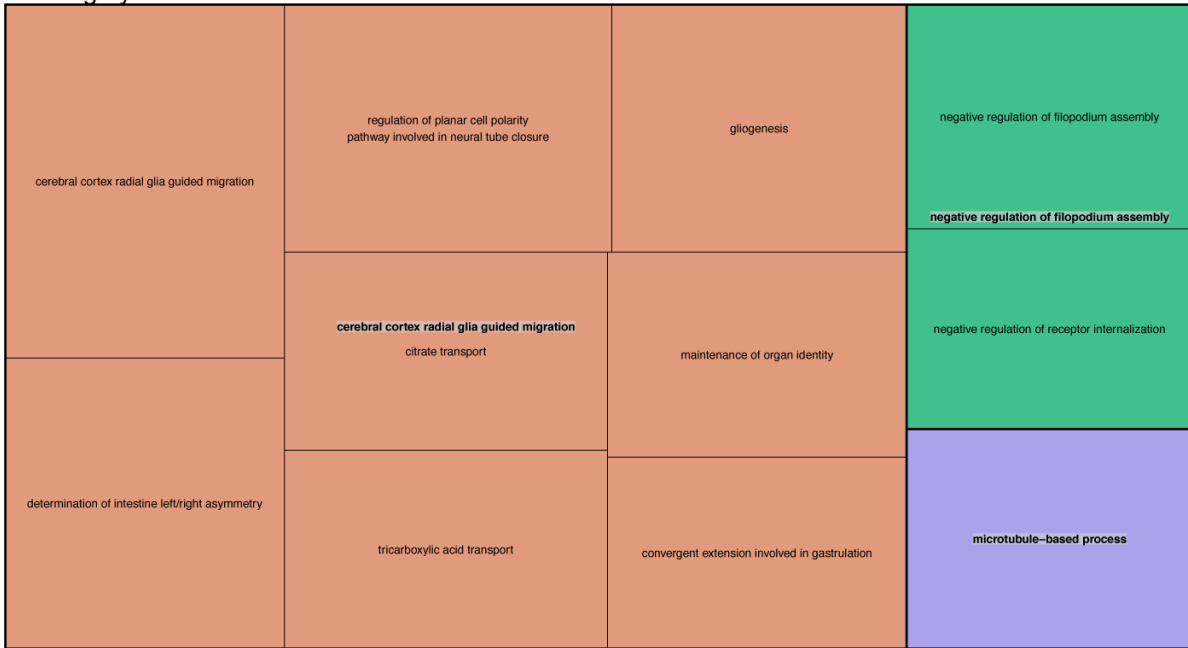

M17-Orange

REVIGO Gene Ontology treemap

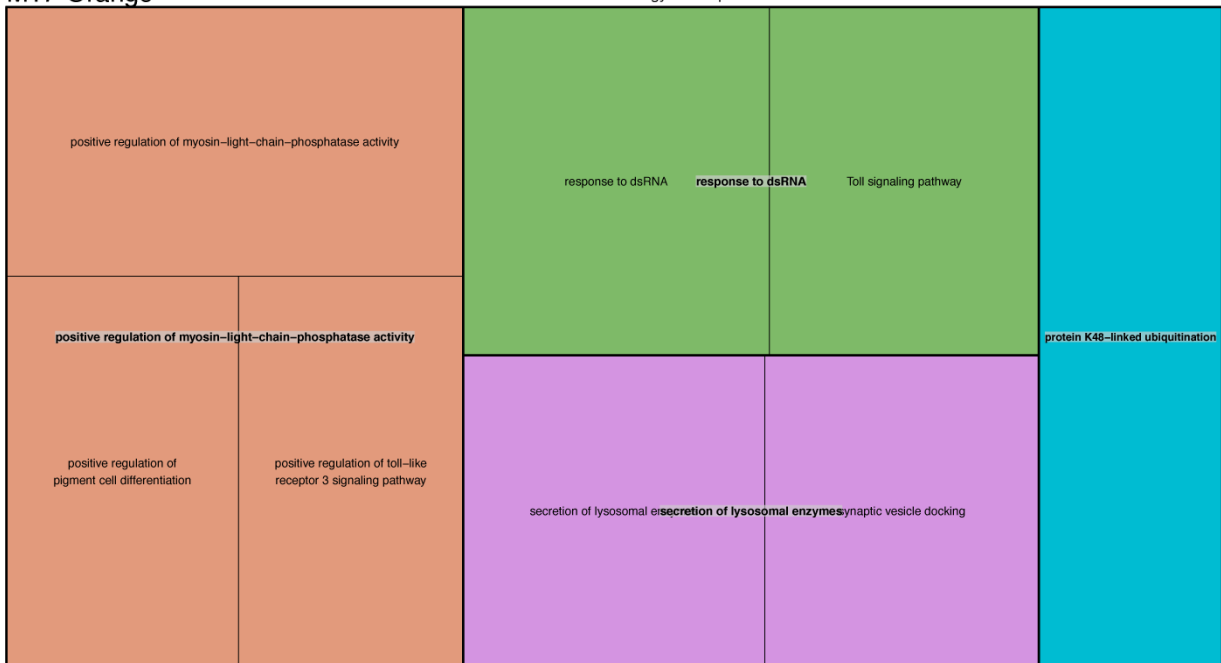

M6-Purple

REVIGO Gene Ontology treemap

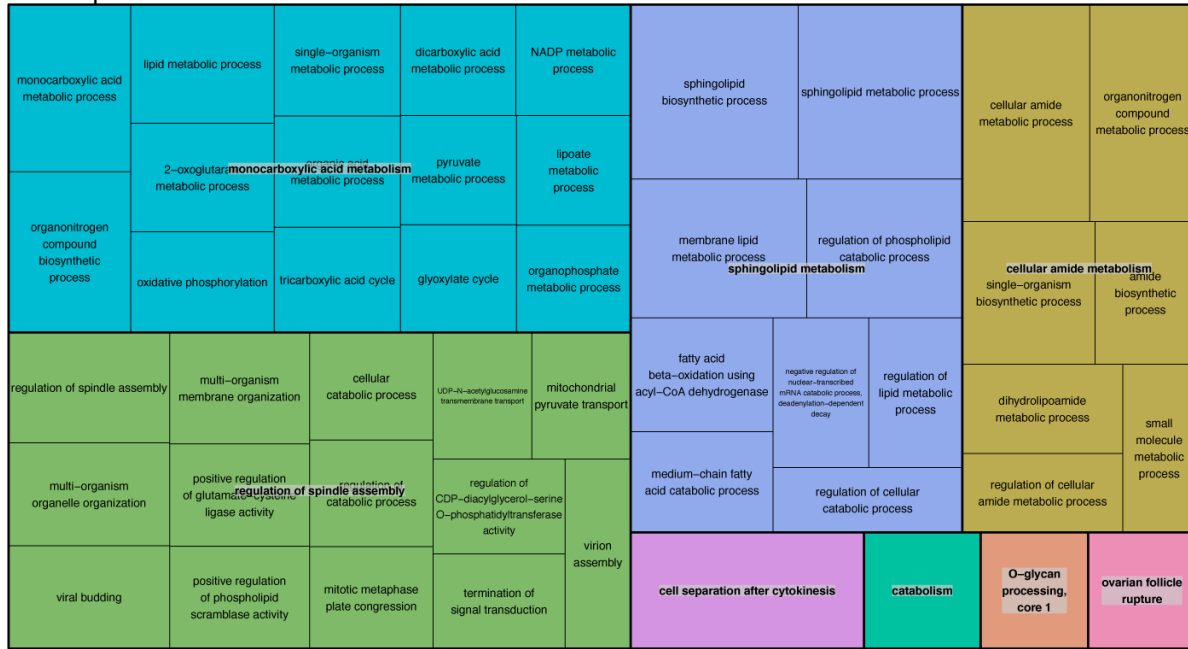

M15-Royalblue

REVIGO Gene Ontology treemap

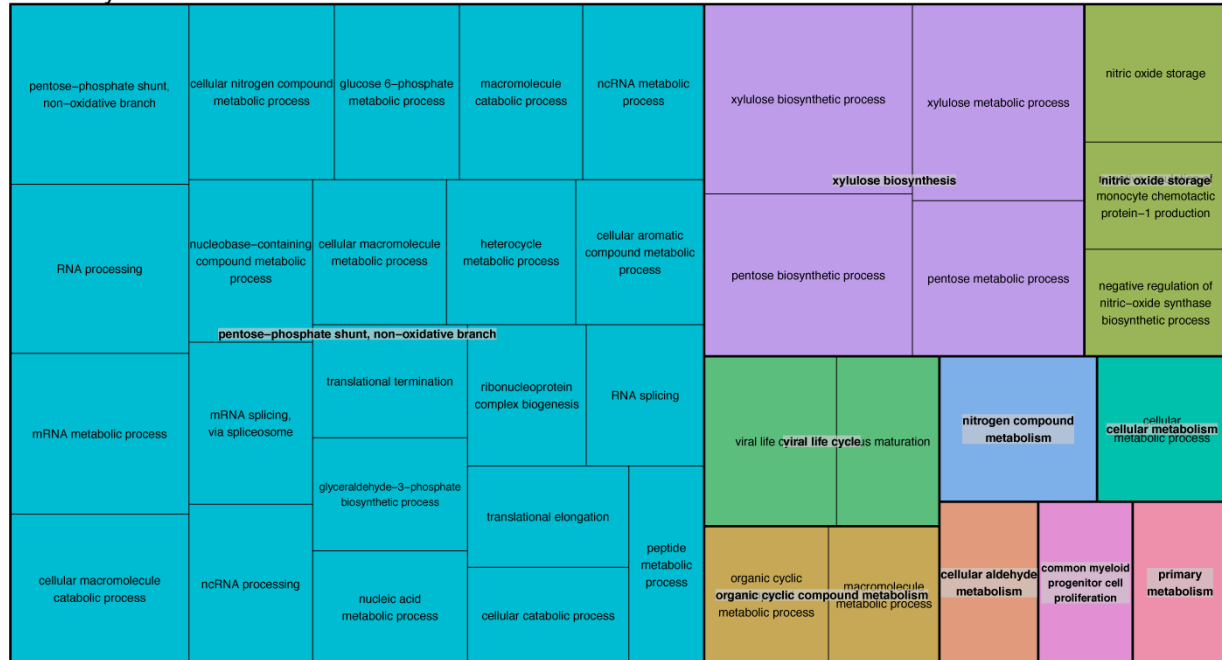



### M14-Salmon

REVIGO Gene Ontology treemap

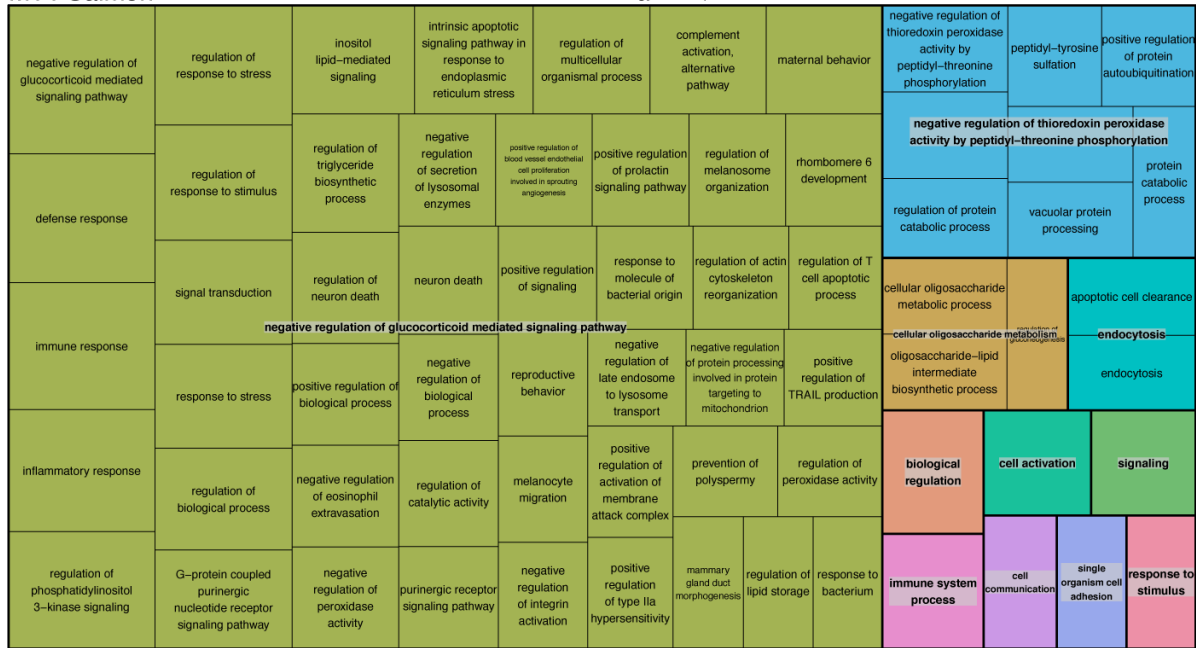

### M4-Turquoise

REVIGO Gene Ontology treemap

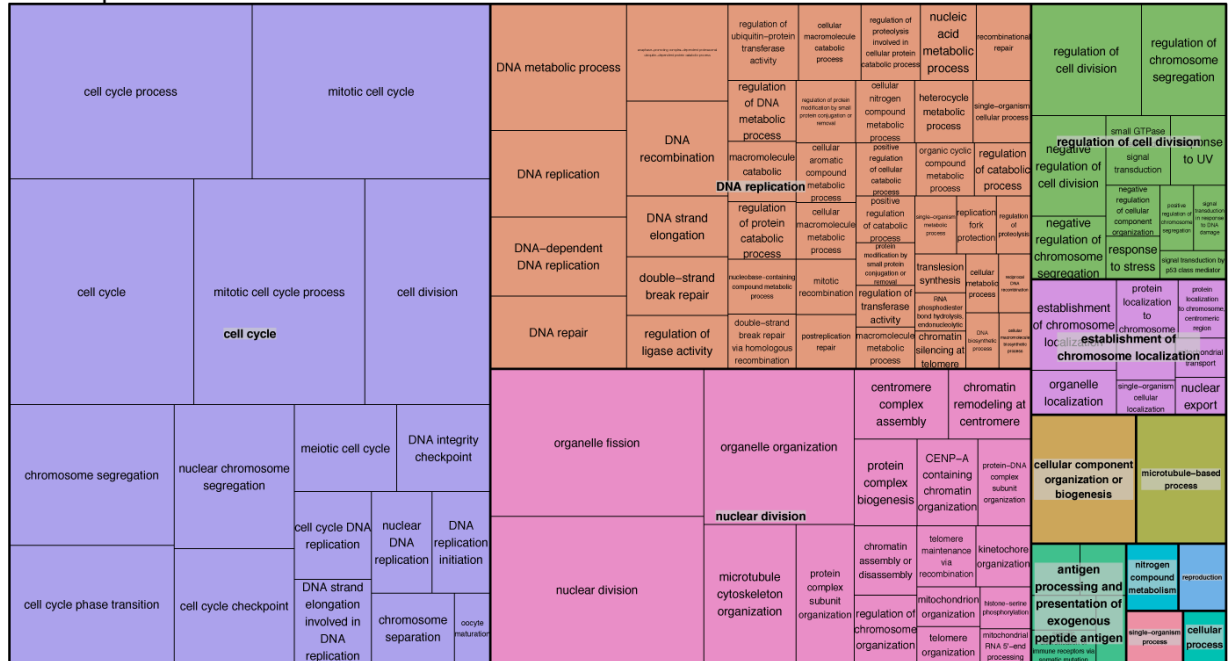







## M8-darkturquoise

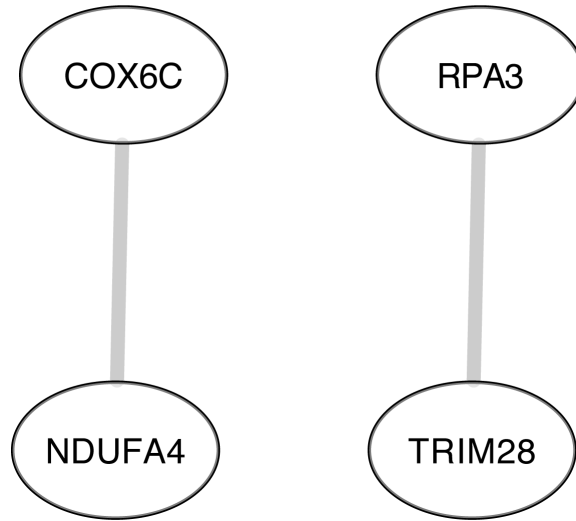

## M1-green

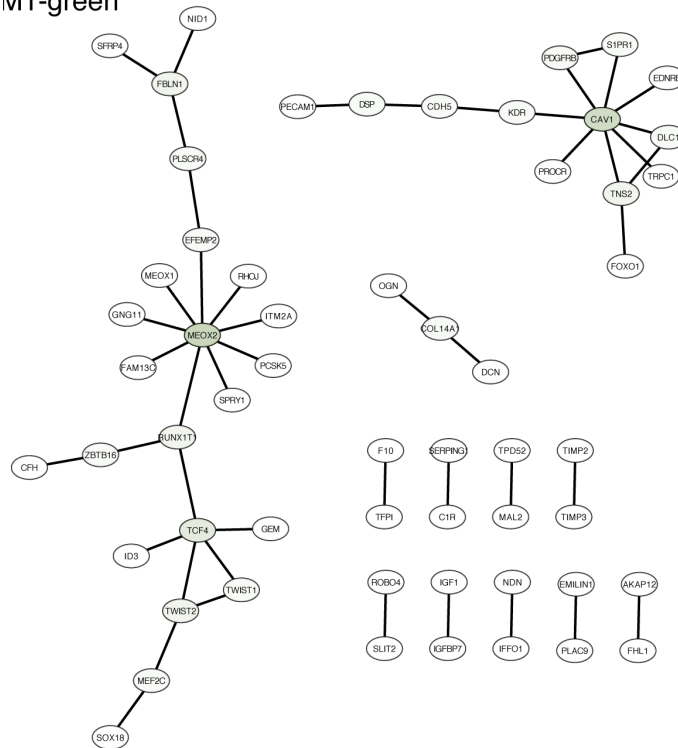

## M6-Purple

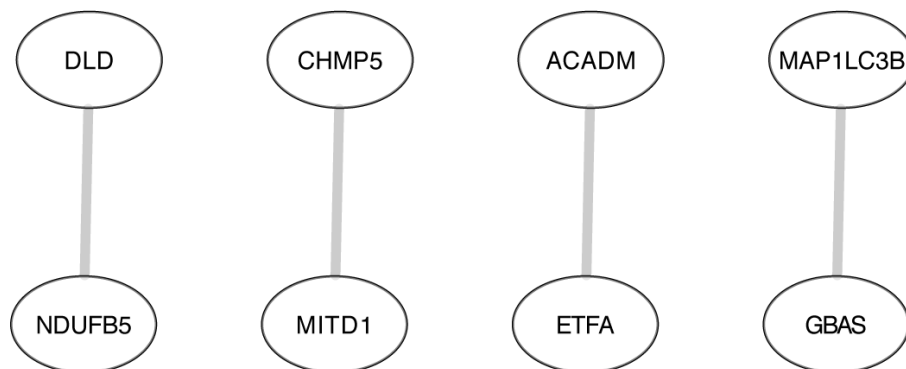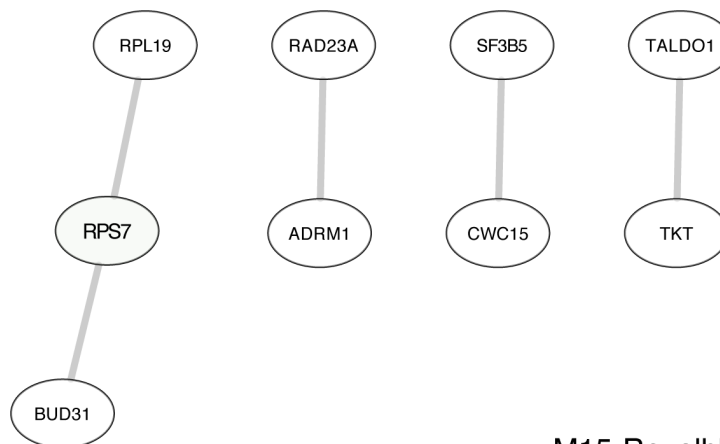

## M15-Royalblue

## M14-Salmon

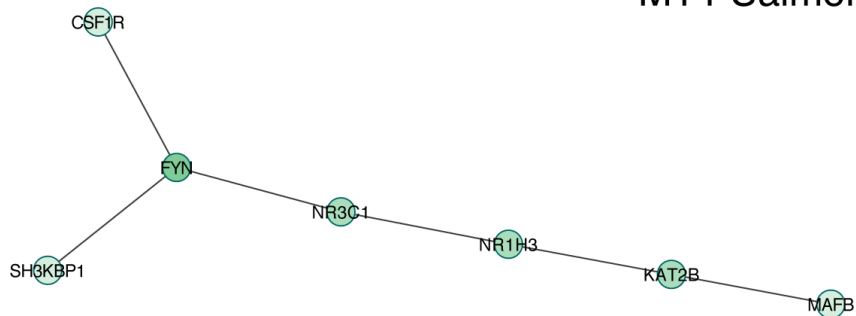



# BLACK

Weighted

Best cutoff

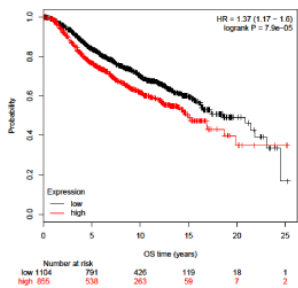

Significance vs cutoff values between lower and upper quartiles of expression.

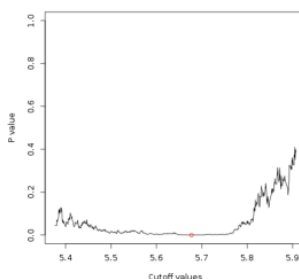

Median

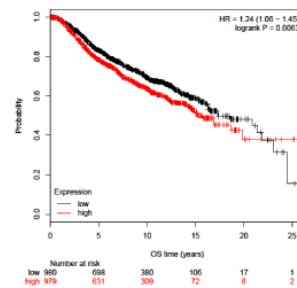

Not weighted

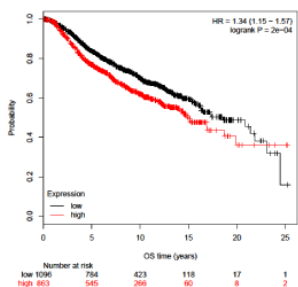

Significance vs cutoff values between lower and upper quartiles of expression.

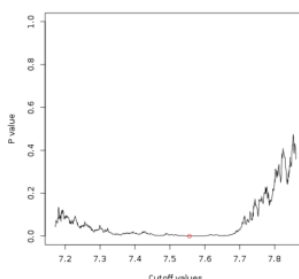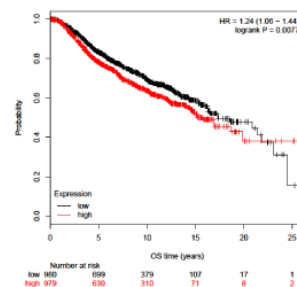

# BROWN

Weighted

Best cutoff

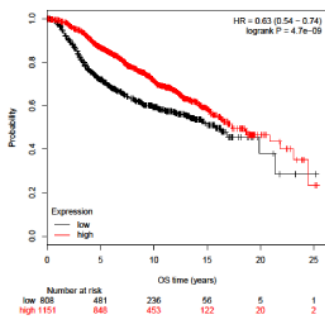

Significance vs cutoff values between lower and upper quartiles of expression.

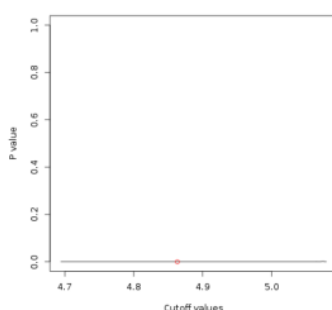

Median

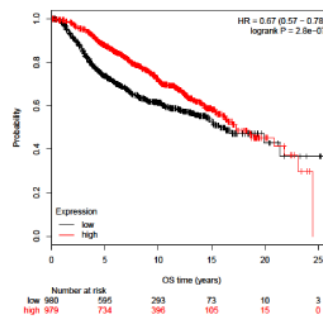

Not weighted

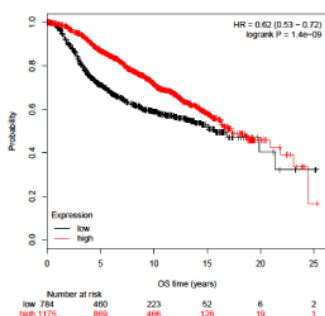

Significance vs cutoff values between lower and upper quartiles of expression.

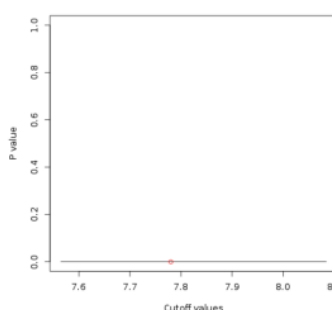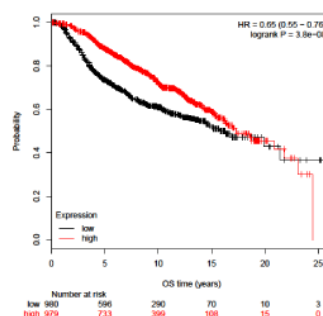



# CYAN

## Best cutoff

## Median

Weighted

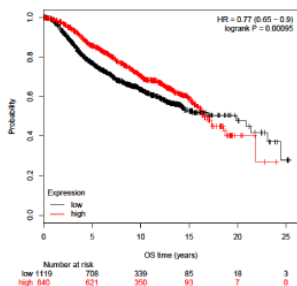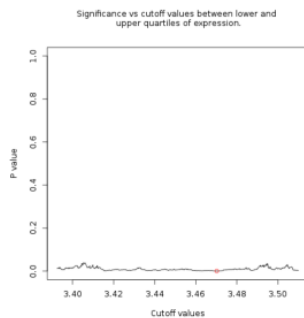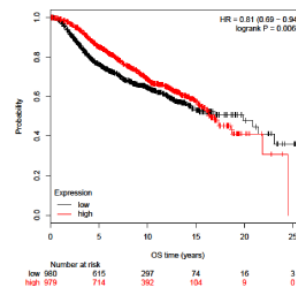

Not weighted

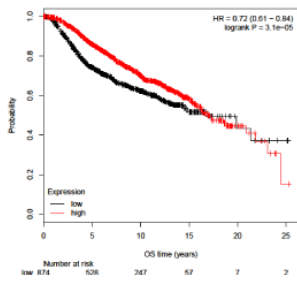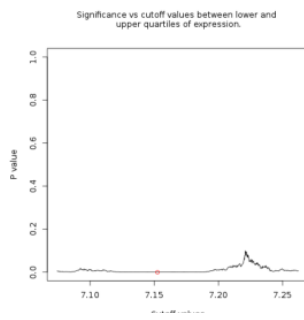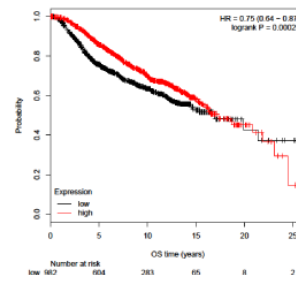

# DARKGREY

## Best cutoff

## Median

Weighted

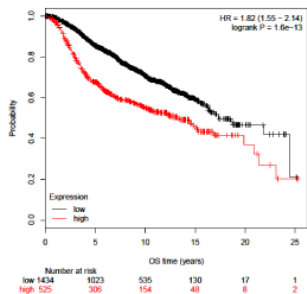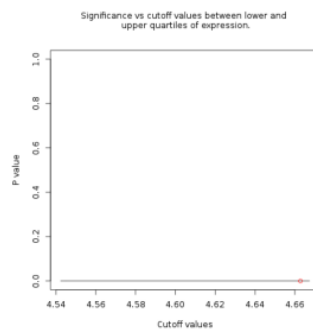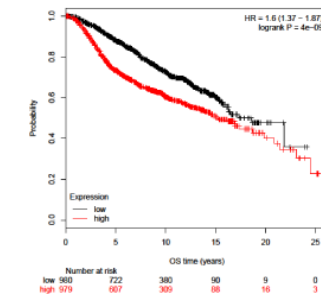

Not weighted

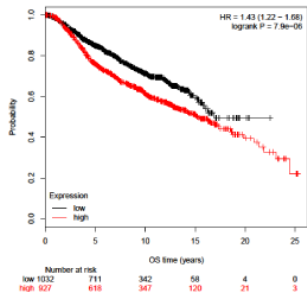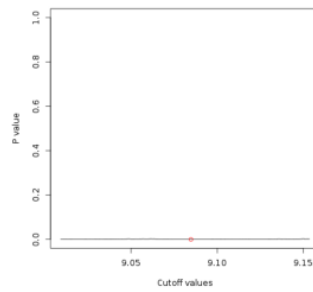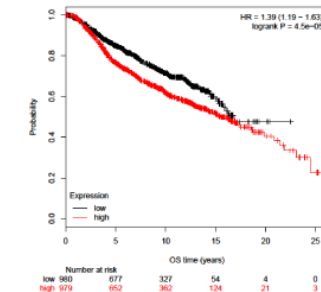

# DARKORANGE

Weighted

Best cutoff

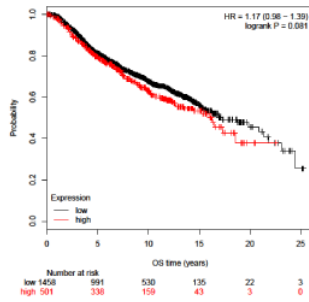

Significance vs cutoff values between lower and upper quartiles of expression.

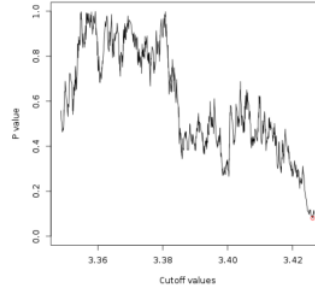

Median

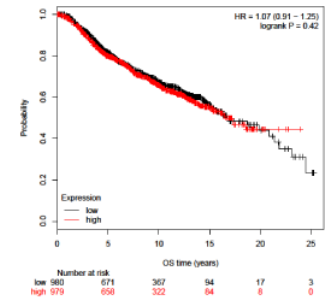

Significance vs cutoff values between lower and upper quartiles of expression.

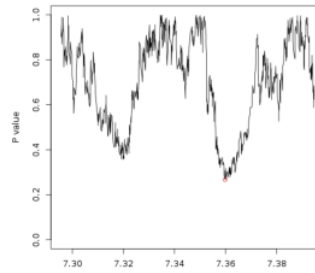

Not weighted

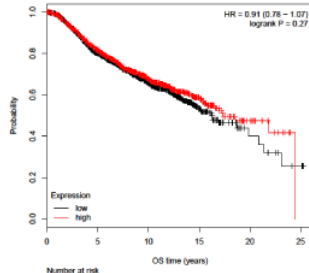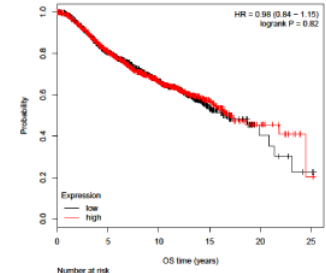

# DARKRED

Weighted

Best cutoff

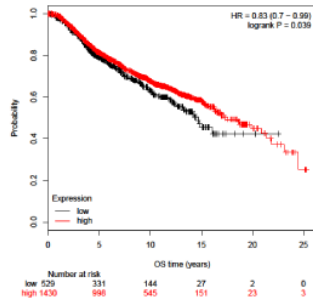

Significance vs cutoff values between lower and upper quartiles of expression.

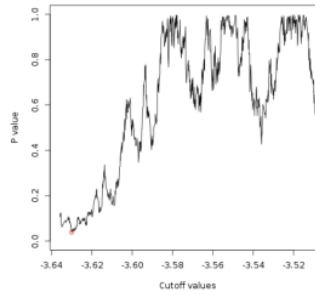

Median

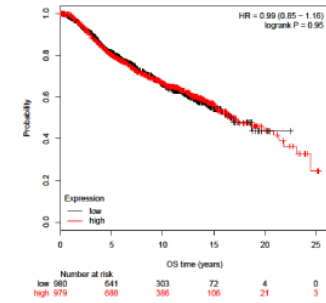

Significance vs cutoff values between lower and upper quartiles of expression.

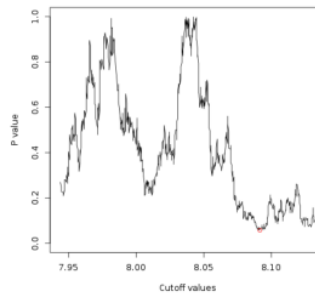

Not weighted

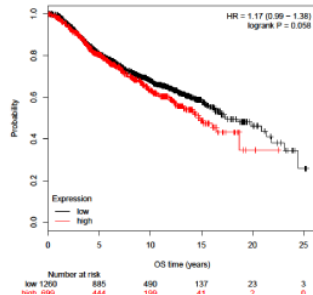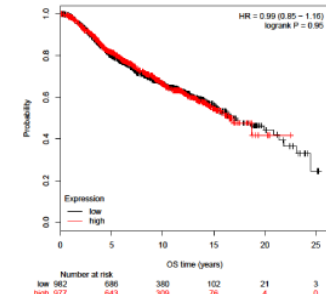

# DARKTURQUOISE

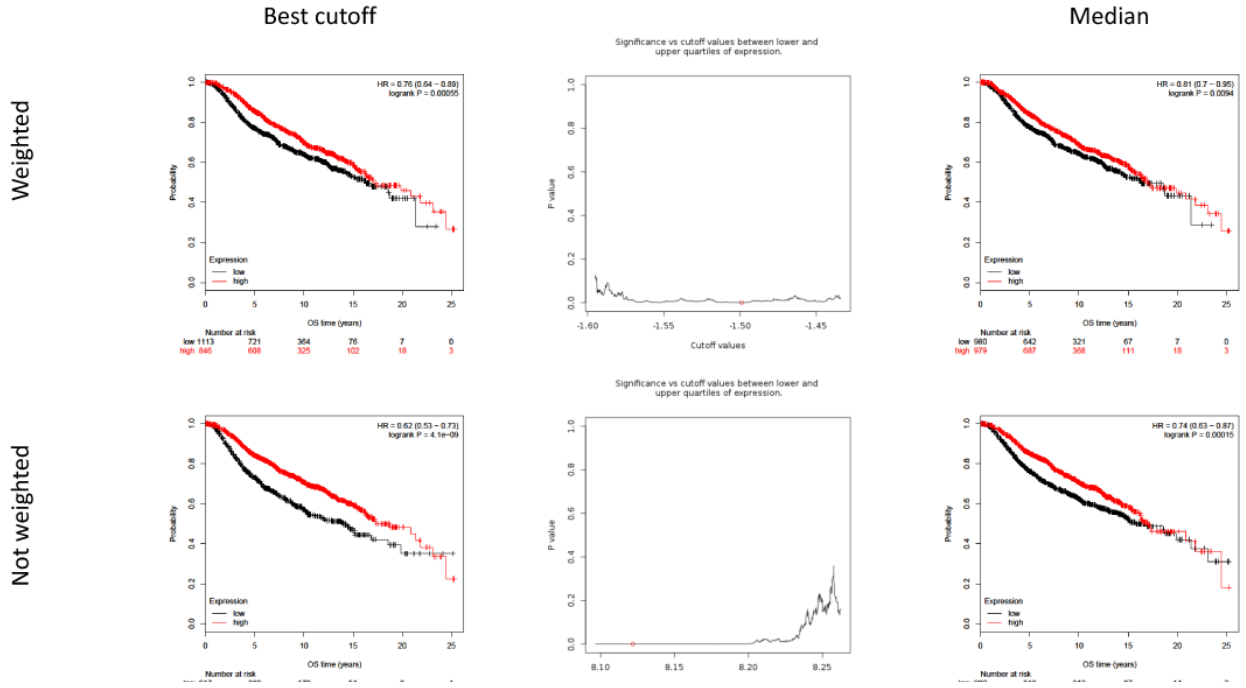

# GREEN

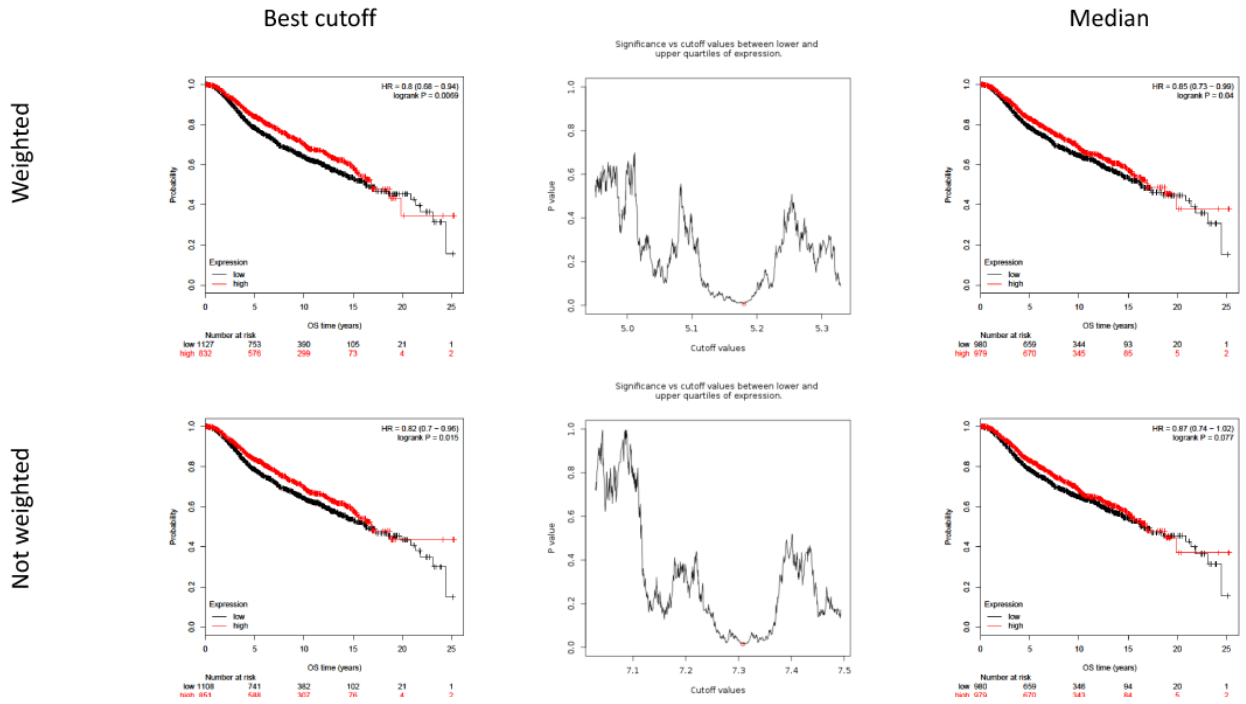

# GREENYELLOW

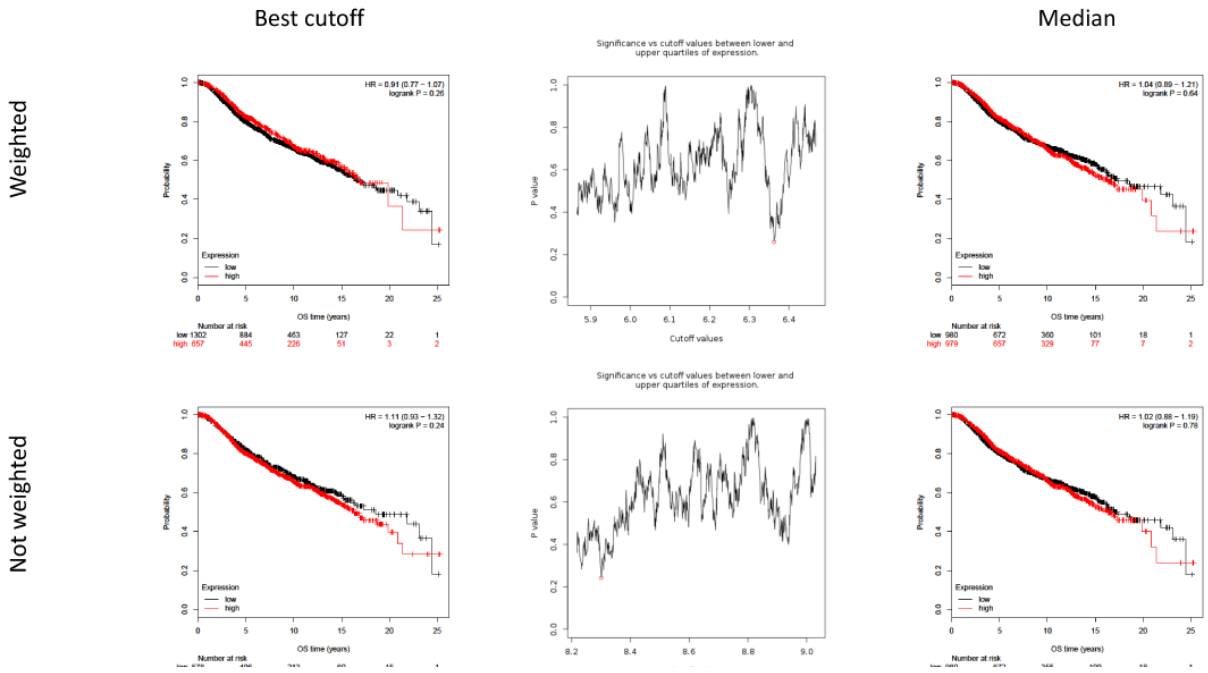

# GREY60

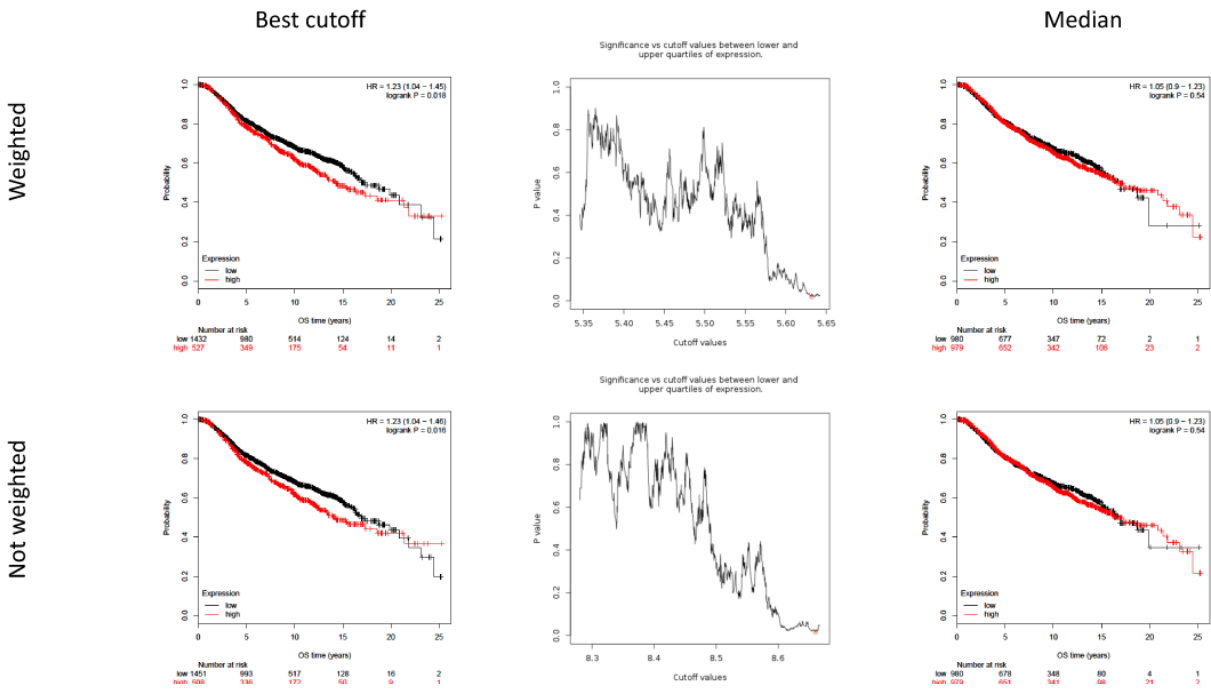

# GREY500

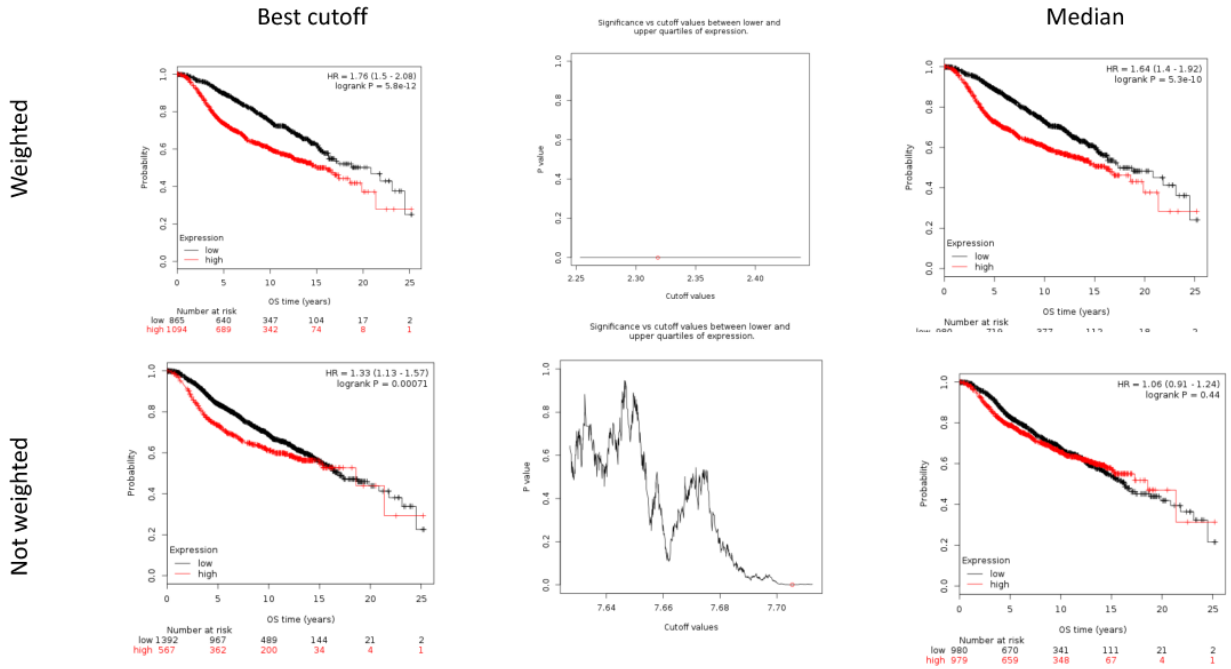

# LIGHTYELLOW

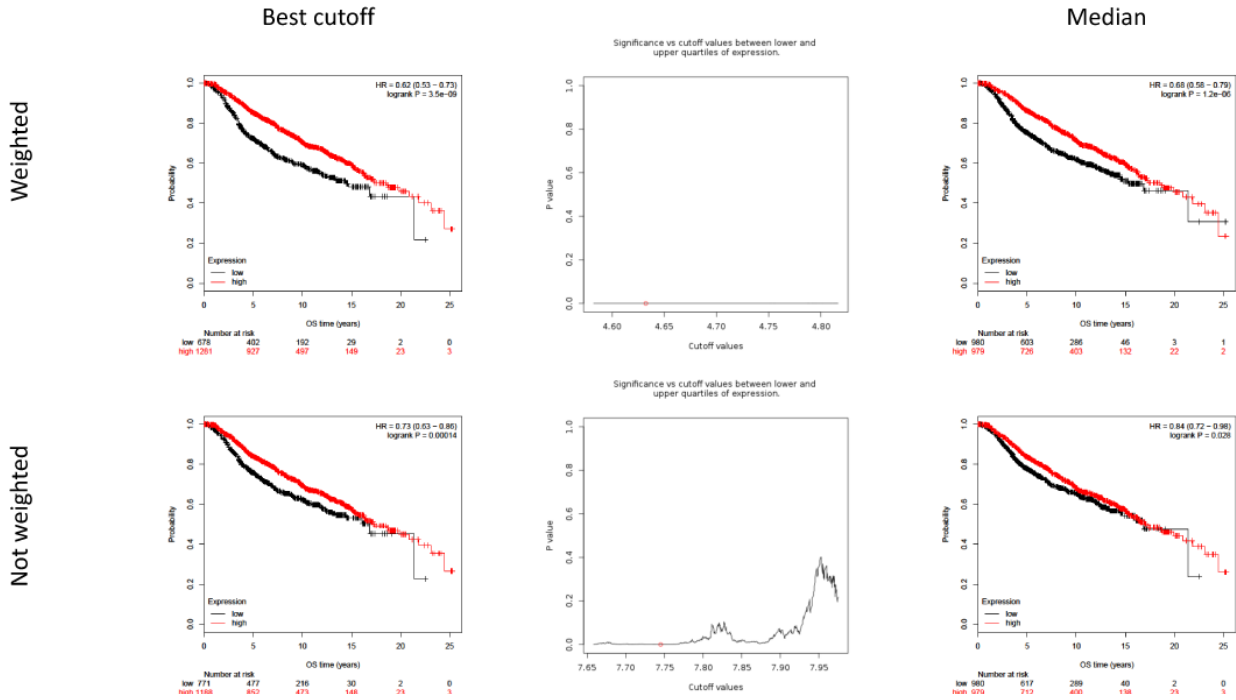

# ORANGE

Weighted

Best cutoff

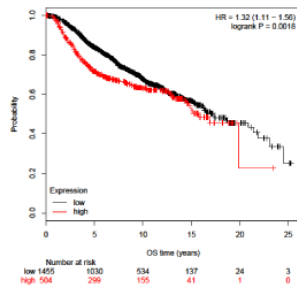

Significance vs cutoff values between lower and upper quartiles of expression.

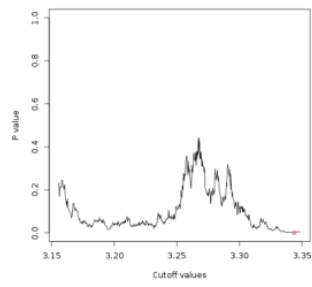

Median

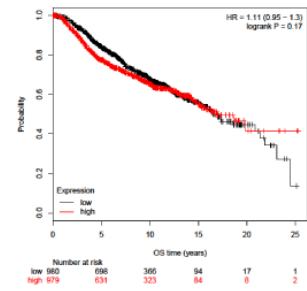

Significance vs cutoff values between lower and upper quartiles of expression.

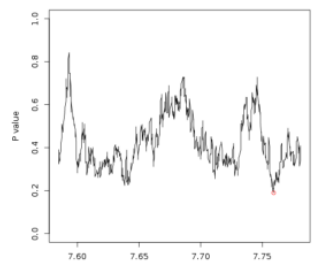

Not weighted

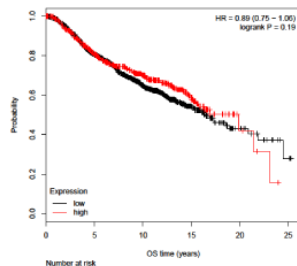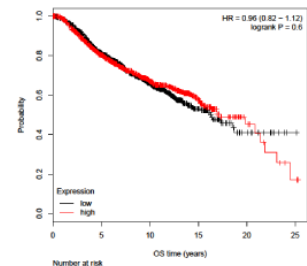

# PURPLE

Weighted

Best cutoff

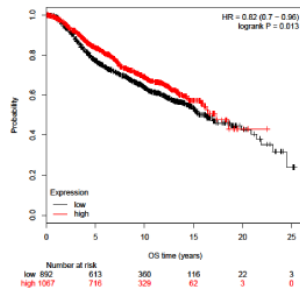

Significance vs cutoff values between lower and upper quartiles of expression.

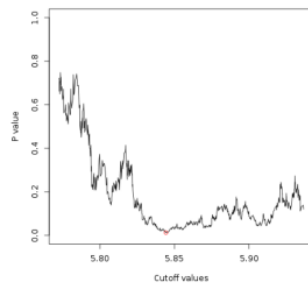

Median

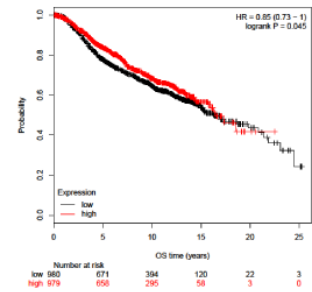

Significance vs cutoff values between lower and upper quartiles of expression.

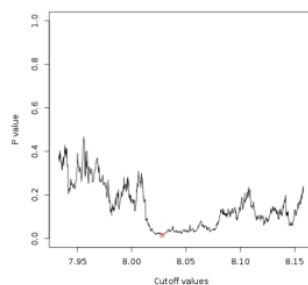

Not weighted

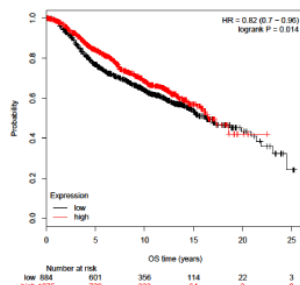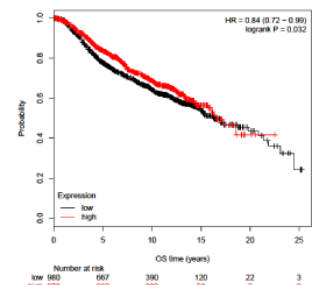

# ROYALBLUE

Weighted

Best cutoff

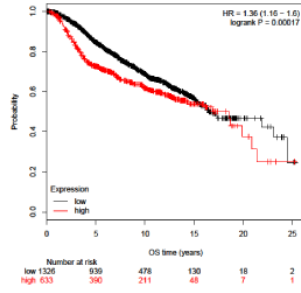

Significance vs cutoff values between lower and upper quartiles of expression.

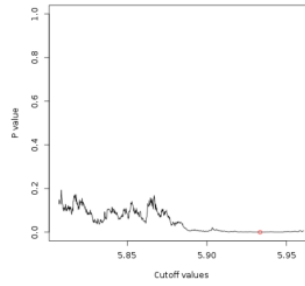

Median

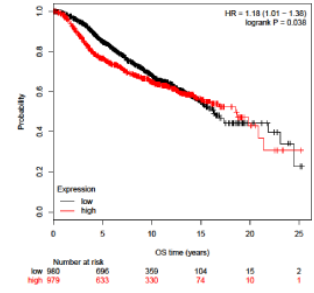

Significance vs cutoff values between lower and upper quartiles of expression.

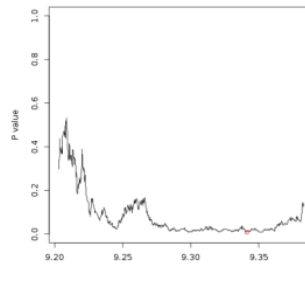

Not weighted

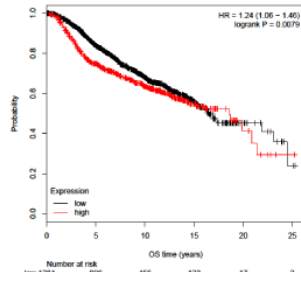

# SALMON

Weighted

Best cutoff

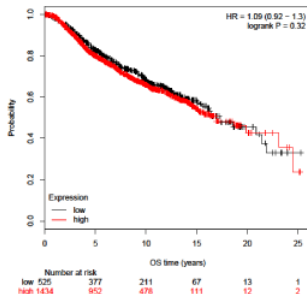

Significance vs cutoff values between lower and upper quartiles of expression.

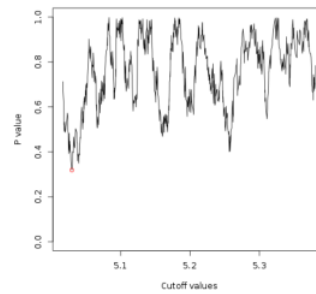

Median

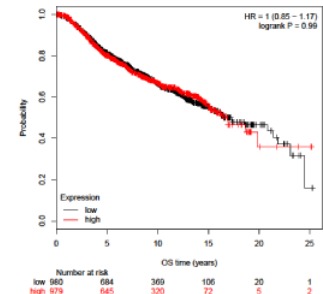

Significance vs cutoff values between lower and upper quartiles of expression.

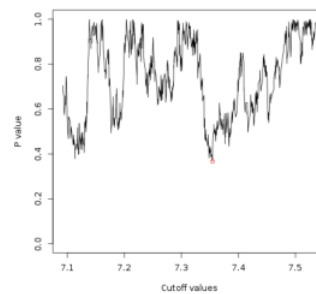

Not weighted

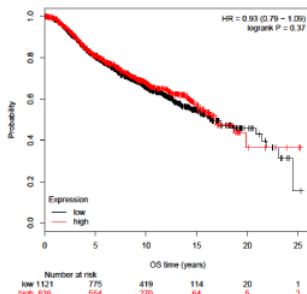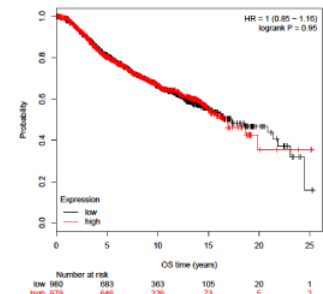

## TURQUOISE

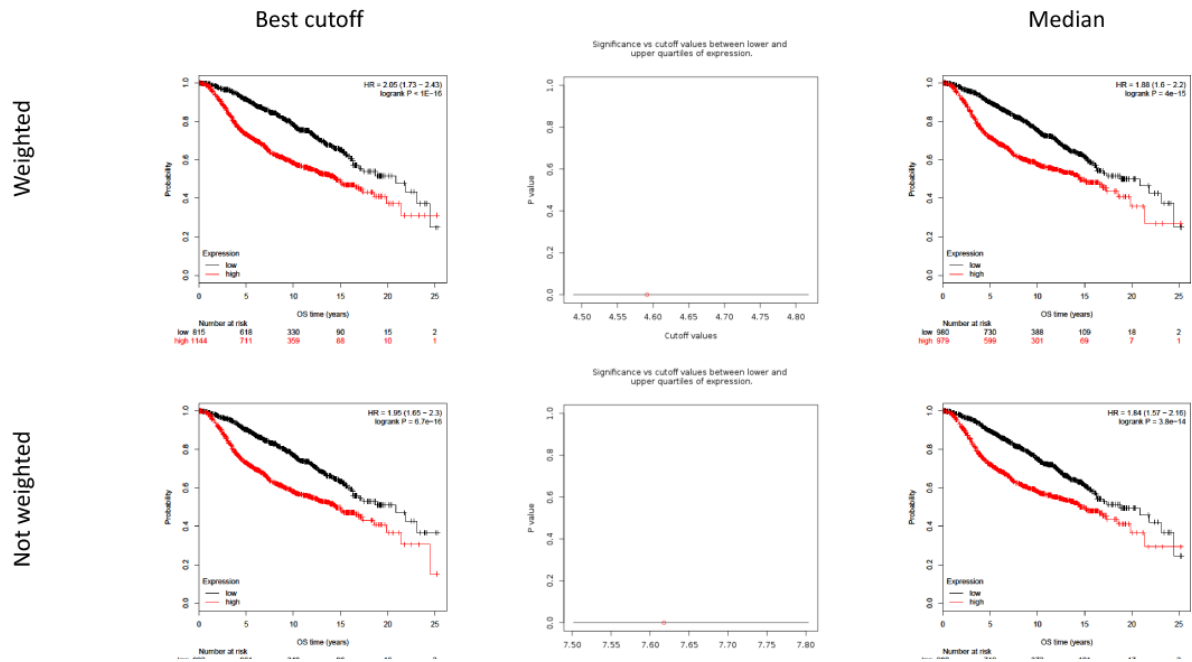

## YELLOW

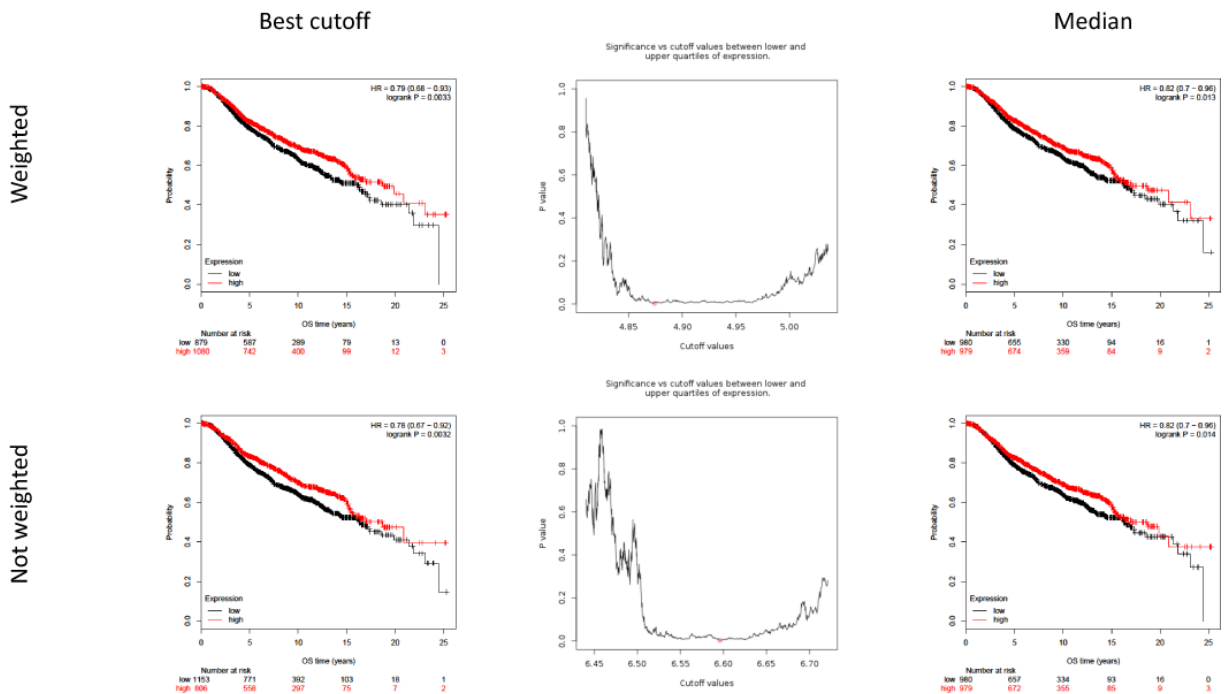

**Supplementary Figure 5: KM plots for genes in modules splitting Metabarc samples in low-expressing and high-expressing gene sets.** Upper panels labeled show results using genes values weighted by gene membership in the corresponding module.



**Supplementary Table 1: Overlaps between genes in modules and previously reported breast cancer dysregulated genes. *P*-values were obtained by means of a Fisher's exact test. See Supplementary\_Table\_1**

**Supplementary Table 2: Expression summary statistics of genes in modules in normal and tumor Metabric samples. Rows are colored according to the direction of changes (green, up-regulated and red, down-regulated)**

| sample | genelist      | min    | Q1     | median | Q3     | max    | <i>p</i> _value |
|--------|---------------|--------|--------|--------|--------|--------|-----------------|
| normal | black         | 9.846  | 10.095 | 10.183 | 10.32  | 11.005 |                 |
| tumour | black         | 8.268  | 10.411 | 10.81  | 11.282 | 12.911 | 3.79E-42        |
| normal | brown         | 9.584  | 10.014 | 10.266 | 10.501 | 11.183 |                 |
| tumour | brown         | 9.079  | 10.753 | 11.144 | 11.438 | 12.322 | 8.81E-40        |
| normal | cyan          | 10.059 | 10.178 | 10.215 | 10.262 | 10.373 |                 |
| tumour | cyan          | 8.407  | 10.171 | 10.279 | 10.375 | 10.788 | 2.07E-08        |
| normal | darkgrey      | 11.807 | 11.884 | 11.925 | 11.975 | 12.089 |                 |
| tumour | darkgrey      | 10.443 | 12.951 | 13.04  | 13.129 | 13.577 | 1.12E-88        |
| normal | darkorange    | 10.159 | 10.28  | 10.349 | 10.4   | 10.539 |                 |
| tumour | darkorange    | 8.446  | 10.429 | 10.5   | 10.576 | 10.949 | 1.86E-55        |
| normal | darkred       | 10.318 | 10.514 | 10.576 | 10.654 | 10.87  |                 |
| tumour | darkred       | 8.932  | 10.819 | 10.917 | 11.024 | 11.62  | 2.75E-68        |
| normal | darkturquoise | 11.099 | 11.225 | 11.272 | 11.33  | 11.617 |                 |
| tumour | darkturquoise | 9.559  | 11.72  | 11.837 | 11.959 | 12.478 | 1.26E-86        |
| normal | green         | 10.128 | 10.943 | 11.194 | 11.363 | 11.642 |                 |
| tumour | green         | 8.479  | 10.106 | 10.378 | 10.661 | 12.027 | 6.26E-62        |
| normal | greenyellow   | 10.243 | 10.789 | 10.964 | 11.168 | 12.182 |                 |
| tumour | greenyellow   | 9.617  | 11.485 | 12.02  | 12.531 | 14.175 | 3.66E-56        |
| normal | grey          | 10.283 | 10.396 | 10.432 | 10.452 | 10.49  |                 |
| tumour | grey          | 8.595  | 10.484 | 10.536 | 10.589 | 10.768 | 4.88E-59        |
| normal | grey60        | 9.086  | 9.883  | 10.346 | 10.553 | 10.917 |                 |
| tumour | grey60        | 8.749  | 10.877 | 11.106 | 11.288 | 11.892 | 2.20E-69        |
| normal | lightyellow   | 10.555 | 10.728 | 10.808 | 10.898 | 11.209 |                 |
| tumour | lightyellow   | 8.488  | 10.551 | 10.705 | 10.879 | 11.619 | 2.85E-09        |
| normal | orange        | 10.136 | 10.512 | 10.587 | 10.657 | 10.807 |                 |
| tumour | orange        | 8.364  | 10.367 | 10.484 | 10.621 | 11.156 | 5.00E-11        |
| normal | purple        | 10.562 | 10.799 | 10.889 | 11.007 | 11.238 |                 |
| tumour | purple        | 9.37   | 11.261 | 11.428 | 11.573 | 12.624 | 2.66E-68        |
| normal | royalblue     | 11.33  | 11.428 | 11.48  | 11.541 | 11.749 |                 |
| tumour | royalblue     | 10.078 | 12.233 | 12.335 | 12.445 | 13.087 | 1.12E-88        |
| normal | salmon        | 9.905  | 10.347 | 10.498 | 10.7   | 11.221 |                 |
| tumour | salmon        | 8.219  | 10.237 | 10.468 | 10.722 | 11.846 | 0.103305466     |
| normal | turquoise     | 10.261 | 10.325 | 10.35  | 10.401 | 10.914 |                 |
| tumour | turquoise     | 8.941  | 10.856 | 11.049 | 11.26  | 12.003 | 1.36E-86        |
| normal | yellow        | 9.846  | 10.454 | 11.16  | 11.874 | 12.84  |                 |
| tumour | yellow        | 7.864  | 9.607  | 9.724  | 9.926  | 13.217 | 1.07E-76        |

**Supplementary Table 3: Gene Ontology categories enriched in each gene module.** See Supplementary\_Table\_3

**Supplementary Table 4: List of drugs associated to hub genes in modules.** See Supplementary\_Table\_4

**Supplementary Table 5: Achieved hazard rate and *p*-values for each module**

|                  | weighted    |        |                 |             |             |        | unweighted  |        |                 |             |             |        |
|------------------|-------------|--------|-----------------|-------------|-------------|--------|-------------|--------|-----------------|-------------|-------------|--------|
|                  | HR          |        | <i>p</i> _value |             | cutoff      |        | HR          |        | <i>p</i> _value |             | cutoff      |        |
|                  | best_cutoff | median | best_cutoff     | median      | best_cutoff | median | best_cutoff | median | best_cutoff     | median      | best_cutoff | median |
| M7-black         | 1.37        | 1.24   | 0.000079        | 0.0063      | 5.68        | 5.62   | 1.34        | 1.24   | 0.0002          | 0.0077      | 7.56        | 7.49   |
| M2-brown         | 0.63        | 0.67   | 4.7E-09         | 0.00000028  | 4.86        | 4.93   | 0.62        | 0.65   | 1.4E-09         | 0.000000038 | 7.78        | 7.88   |
| M10-cyan         | 0.77        | 0.81   | 0.00095         | 0.0065      | 3.47        | 3.46   | 0.72        | 0.75   | 0.000031        | 0.00025     | 7.15        | 7.17   |
| M9-darkgrey      | 1.82        | 1.6    | 1.6E-13         | 0.000000004 | 4.66        | 4.6    | 1.43        | 1.39   | 0.0000079       | 0.000045    | 9.08        | 9.08   |
| M12-darkorange   | 1.17        | 1.07   | 0.081           | 0.42        | 3.43        | 3.39   | 0.91        | 0.98   | 0.27            | 0.82        | 7.36        | 7.34   |
| M3-darkred       | 0.83        | 0.99   | 0.039           | 0.95        | -3.63       | -3.57  | 1.17        | 0.99   | 0.058           | 0.95        | 8.09        | 8.04   |
| M8-darkturquoise | 0.76        | 0.81   | 0.00055         | 0.0094      | -1.5        | -1.52  | 0.62        | 0.74   | 4.1E-09         | 0.00015     | 8.12        | 8.18   |
| M1-green         | 0.8         | 0.85   | 0.0069          | 0.04        | 5.18        | 5.13   | 0.82        | 0.87   | 0.015           | 0.077       | 7.31        | 7.26   |
| M11-greenyellow  | 0.91        | 1.04   | 0.26            | 0.64        | 6.36        | 6.18   | 1.11        | 1.02   | 0.24            | 0.78        | 8.3         | 8.64   |
| M0-grey          | 1.76        | 1.64   | 5.80E-12        | 5.30E-10    | 2.32        | 2.34   | 1.33        | 1.06   | 0.00071         | 0.44        | 7.71        | 7.67   |
| M13-grey60       | 1.23        | 1.05   | 0.018           | 0.54        | 5.63        | 5.51   | 1.23        | 1.05   | 0.016           | 0.54        | 8.66        | 8.49   |
| M16-lightyellow  | 0.62        | 0.68   | 3.5E-09         | 0.0000012   | 4.63        | 4.7    | 0.73        | 0.84   | 0.00014         | 0.028       | 7.75        | 7.8    |
| M17-orange       | 1.32        | 1.11   | 0.0018          | 0.17        | 3.34        | 3.25   | 0.89        | 0.96   | 0.19            | 0.6         | 7.76        | 7.68   |
| M6-purple        | 0.82        | 0.85   | 0.013           | 0.045       | 5.84        | 5.86   | 0.82        | 0.84   | 0.014           | 0.032       | 8.03        | 8.05   |
| M15-royalblue    | 1.36        | 1.18   | 0.00017         | 0.038       | 5.93        | 5.88   | 1.24        | 1.2    | 0.0079          | 0.023       | 9.34        | 9.29   |
| M14-salmon       | 1.09        | 1      | 0.32            | 0.99        | 5.03        | 5.18   | 0.93        | 1      | 0.37            | 0.95        | 7.35        | 7.29   |
| M4-turquoise     | 2.05        | 1.88   | 1E-16           | 4E-15       | 4.59        | 4.64   | 1.95        | 1.84   | 6.7E-16         | 3.8E-14     | 7.62        | 7.64   |
| M5-yellow        | 0.79        | 0.82   | 0.0033          | 0.013       | 4.87        | 4.89   | 0.78        | 0.82   | 0.0032          | 0.014       | 6.6         | 6.54   |
