# Supplementary material for: Transcriptome evolution from breast epithelial cells to basal-like tumors
Source: PubMed Central journal article supplement (PMC5787480; doi:10.18632/oncotarget.23065), 2017-12-08
Supplement: oncotarget-09-453-s003.pdf [file oncotarget-09-453-s003.pdf]

| GOBPID     | Pvalue    | OddsRatio   | ExpCount    | Count | Size | Term                                                       |
|------------|-----------|-------------|-------------|-------|------|------------------------------------------------------------|
| GO:0044281 | 1.66E-18  | 6.322353029 | 15.91670015 | 54    | 2377 | small molecule metabolic process                           |
| GO:0006629 | 8.29E-18  | 7.522473971 | 8.042051694 | 39    | 1201 | lipid metabolic process                                    |
| GO:0044255 | 2.23E-15  | 7.453027976 | 6.113566359 | 32    | 913  | cellular lipid metabolic process                           |
| GO:0044710 | 3.92E-15  | 5.147019714 | 33.574394   | 72    | 5014 | single-organism metabolic process                          |
| GO:0055114 | 1.26E-12  | 6.118728851 | 6.702825767 | 30    | 1001 | oxidation-reduction process                                |
| GO:0006641 | 1.47E-12  | 20.18612254 | 0.816927816 | 13    | 122  | triglyceride metabolic process                             |
| GO:0006639 | 3.35E-12  | 18.79565773 | 0.870496853 | 13    | 130  | acylglycerol metabolic process                             |
| GO:0006638 | 3.70E-12  | 18.63510618 | 0.877192982 | 13    | 131  | neutral lipid metabolic process                            |
| GO:0032787 | 3.07E-10  | 6.964980545 | 3.575733226 | 20    | 534  | monocarboxylic acid metabolic process                      |
| GO:0046486 | 6.17E-10  | 8.751054852 | 2.22311504  | 16    | 332  | glycerolipid metabolic process                             |
| GO:0019752 | 1.07E-09  | 5.210014948 | 6.140350877 | 25    | 917  | carboxylic acid metabolic process                          |
| GO:0043436 | 2.65E-09  | 4.808991169 | 6.937190304 | 26    | 1036 | oxoacid metabolic process                                  |
| GO:0006066 | 3.07E-09  | 7.768745808 | 2.484264095 | 16    | 371  | alcohol metabolic process                                  |
| GO:0019915 | 3.32E-09  | 26.78623188 | 0.37498326  | 8     | 56   | lipid storage                                              |
| GO:0006082 | 3.73E-09  | 4.723571673 | 7.051024508 | 26    | 1053 | organic acid metabolic process                             |
| GO:0055088 | 5.65E-09  | 15.29283489 | 0.783447168 | 10    | 117  | lipid homeostasis                                          |
| GO:0034308 | 7.59E-09  | 33.75920495 | 0.267845185 | 7     | 40   | primary alcohol metabolic process                          |
| GO:0006631 | 3.57E-08  | 7.552344156 | 2.189634391 | 14    | 327  | fatty acid metabolic process                               |
| GO:1901615 | 6.07E-08  | 5.811594894 | 3.495379671 | 17    | 522  | organic hydroxy compound metabolic process                 |
| GO:0010883 | 1.28E-07  | 31.49787234 | 0.241060667 | 6     | 36   | regulation of lipid storage                                |
| GO:0019432 | 1.58E-07  | 20.60135404 | 0.408463908 | 7     | 61   | triglyceride biosynthetic process                          |
| GO:0046460 | 1.99E-07  | 19.86290323 | 0.421856167 | 7     | 63   | neutral lipid biosynthetic process                         |
| GO:0046463 | 1.99E-07  | 19.86290323 | 0.421856167 | 7     | 63   | acylglycerol biosynthetic process                          |
| GO:0010876 | 2.18E-07  | 7.047245858 | 2.149457613 | 13    | 321  | lipid localization                                         |
| GO:0008610 | 2.54E-07  | 5.220697074 | 3.863666801 | 17    | 577  | lipid biosynthetic process                                 |
| GO:0010889 | 6.02E-07  | 88.25595238 | 0.073657426 | 4     | 11   | regulation of sequestering of triglyceride                 |
| GO:0042221 | 8.65E-07  | 2.744087825 | 24.57479577 | 47    | 3670 | response to chemical                                       |
| GO:0030730 | 1.80E-06  | 61.76666667 | 0.093745815 | 4     | 14   | sequestering of triglyceride                               |
| GO:0051186 | 1.98E-06  | 6.244766275 | 2.203026651 | 12    | 329  | cofactor metabolic process                                 |
| GO:0006732 | 2.17E-06  | 6.847566967 | 1.834739521 | 11    | 274  | coenzyme metabolic process                                 |
| GO:0019433 | 2.49E-06  | 27.83082707 | 0.220972278 | 5     | 33   | triglyceride catabolic process                             |
| GO:0044711 | 2.83E-06  | 3.190518521 | 10.49953127 | 27    | 1568 | single-organism biosynthetic process                       |
| GO:1901700 | 2.93E-06  | 3.248058832 | 9.870095085 | 26    | 1474 | response to oxygen-containing compound                     |
| GO:0006793 | 2.95E-06  | 2.726174825 | 19.13084237 | 39    | 2857 | phosphorus metabolic process                               |
| GO:0045017 | 3.31E-06  | 7.346907994 | 1.546805946 | 10    | 231  | glycerolipid biosynthetic process                          |
| GO:0010884 | 4.21E-06  | 47.50320513 | 0.113834204 | 4     | 17   | positive regulation of lipid storage                       |
| GO:0046461 | 4.48E-06  | 24.34539474 | 0.247756797 | 5     | 37   | neutral lipid catabolic process                            |
| GO:0046464 | 4.48E-06  | 24.34539474 | 0.247756797 | 5     | 37   | acylglycerol catabolic process                             |
| GO:0048878 | 5.12E-06  | 3.670190275 | 6.468461229 | 20    | 966  | chemical homeostasis                                       |
| GO:0006091 | 6.78E-06  | 5.078345261 | 2.926208651 | 13    | 437  | generation of precursor metabolites and energy             |
| GO:0044283 | 8.01E-06  | 4.666883721 | 3.441810633 | 14    | 514  | small molecule biosynthetic process                        |
| GO:0019637 | 8.08E-06  | 3.549692623 | 6.669345119 | 20    | 996  | organophosphate metabolic process                          |
| GO:0019216 | 8.50E-06  | 6.561853351 | 1.720905317 | 10    | 257  | regulation of lipid metabolic process                      |
| GO:0051235 | 1.10E-05  | 7.236593407 | 1.399491094 | 9     | 209  | maintenance of location                                    |
| GO:0016042 | 1.11E-05  | 6.352505447 | 1.774474354 | 10    | 265  | lipid catabolic process                                    |
| GO:0042572 | 1.26E-05  | 34.2962963  | 0.147314852 | 4     | 22   | retinol metabolic process                                  |
| GO:0046503 | 1.34E-05  | 18.98973042 | 0.308021963 | 5     | 46   | glycerolipid catabolic process                             |
| GO:0006006 | 1.38E-05  | 7.022938227 | 1.439667872 | 9     | 215  | glucose metabolic process                                  |
| GO:0006094 | 1.45E-05  | 12.90673273 | 0.528994241 | 6     | 79   | gluconeogenesis                                            |
| GO:0006796 | 1.50E-05  | 2.54990826  | 18.8429088  | 37    | 2814 | phosphate-containing compound metabolic process            |
| GO:0006644 | 1.51E-05  | 5.517683665 | 2.249899558 | 11    | 336  | phospholipid metabolic process                             |
| GO:0044242 | 1.75E-05  | 7.924925736 | 1.131645909 | 8     | 169  | cellular lipid catabolic process                           |
| GO:0019319 | 1.80E-05  | 12.39473684 | 0.54908263  | 6     | 82   | hexose biosynthetic process                                |
| GO:0044712 | 2.10E-05  | 3.211439287 | 7.734029731 | 21    | 1155 | single-organism catabolic process                          |
| GO:0080184 | 2.38E-05  | 76.43298969 | 0.060265167 | 3     | 9    | response to phenylpropanoid                                |
| GO:0046364 | 2.88E-05  | 11.34401436 | 0.595955538 | 6     | 89   | monosaccharide biosynthetic process                        |
| GO:0010743 | 2.95E-05  | 26.83152174 | 0.1807955   | 4     | 27   | regulation of macrophage derived foam cell differentiation |
| GO:0009725 | 2.98E-05  | 3.319650941 | 6.682737378 | 19    | 998  | response to hormone                                        |
| GO:0006650 | 3.18E-05  | 6.279789775 | 1.600374983 | 9     | 239  | glycerophospholipid metabolic process                      |
| GO:0016051 | 4.06E-05  | 7.000477783 | 1.272264631 | 8     | 190  | carbohydrate biosynthetic process                          |
| GO:0019318 | 4.38E-05  | 6.014010989 | 1.66733628  | 9     | 249  | hexose metabolic process                                   |
| GO:0006090 | 4.42E-05  | 10.45673759 | 0.642828445 | 6     | 96   | pyruvate metabolic process                                 |
| GO:0010742 | 4.54E-05  | 23.73076923 | 0.200883889 | 4     | 30   | macrophage derived foam cell differentiation               |
| GO:0055090 | 4.54E-05  | 23.73076923 | 0.200883889 | 4     | 30   | acylglycerol homeostasis                                   |
| GO:0070328 | 4.54E-05  | 23.73076923 | 0.200883889 | 4     | 30   | triglyceride homeostasis                                   |
| GO:0090077 | 4.54E-05  | 23.73076923 | 0.200883889 | 4     | 30   | foam cell differentiation                                  |
| GO:0051289 | 4.58E-05  | 14.40545809 | 0.395071649 | 5     | 59   | protein homotetramerization                                |
| GO:0006069 | 4.62E-05  | 57.31701031 | 0.073657426 | 3     | 11   | ethanol oxidation                                          |
| GO:0015711 | 5.90E-05  | 4.713913018 | 2.611490558 | 11    | 390  | organic anion transport                                    |
| GO:0050872 | 6.13E-05  | 50.94501718 | 0.080353556 | 3     | 12   | white fat cell differentiation                             |
| GO:0055089 | 6.13E-05  | 50.94501718 | 0.080353556 | 3     | 12   | fatty acid homeostasis                                     |
| GO:0010885 | 7.94E-05  | 45.84742268 | 0.087049685 | 3     | 13   | regulation of cholesterol storage                          |
| GO:0006790 | 8.37E-05  | 4.944785276 | 2.249899558 | 10    | 336  | sulfur compound metabolic process                          |
| GO:0044262 | 8.42E-05  | 5.500713027 | 1.814651132 | 9     | 271  | cellular carbohydrate metabolic process                    |
| GO:1901698 | 8.91E-05  | 3.13398307  | 6.622472211 | 18    | 989  | response to nitrogen compound                              |
| GO:0050873 | 9.46E-05  | 19.2734375  | 0.241060667 | 4     | 36   | brown fat cell differentiation                             |
| GO:0006067 | 0.0001005 | 41.67666354 | 0.093745815 | 3     | 14   | ethanol metabolic process                                  |
| GO:0010878 | 0.0001005 | 41.67666354 | 0.093745815 | 3     | 14   | cholesterol storage                                        |
| GO:0010243 | 0.000102  | 3.20515733  | 6.08008571  | 17    | 908  | response to organonitrogen compound                        |
| GO:0043434 | 0.0001039 | 3.844403024 | 3.803401634 | 13    | 568  | response to peptide hormone                                |
| GO:0006637 | 0.0001044 | 11.95870445 | 0.468729075 | 5     | 70   | acyl-CoA metabolic process                                 |
| GO:0035383 | 0.0001044 | 11.95870445 | 0.468729075 | 5     | 70   | thioester metabolic process                                |
| GO:0005996 | 0.000105  | 5.334798535 | 1.868220169 | 9     | 279  | monosaccharide metabolic process                           |
| GO:0033197 | 0.000125  | 38.20103093 | 0.100441945 | 3     | 15   | response to vitamin E                                      |
| GO:0015980 | 0.0001287 | 4.680232558 | 2.370429892 | 10    | 354  | energy derivation by oxidation of organic compounds        |
| GO:0006122 | 0.000129  | 6.903091398 | 1.118253649 | 7     | 167  | energy reserve metabolic process                           |
| GO:0006114 | 0.0001326 | 302.7142857 | 0.020088389 | 2     | 3    | glycerol biosynthetic process                              |
| GO:0001523 | 0.000145  | 11.10075188 | 0.502209723 | 5     | 75   | retinoid metabolic process                                 |
| GO:0008203 | 0.000153  | 8.241881299 | 0.803535556 | 6     | 120  | cholesterol metabolic process                              |
| GO:0006071 | 0.0001531 | 35.26011102 | 0.107138074 | 3     | 16   | glycerol metabolic process                                 |

|            |           |             |             |    |       |                                                        |
|------------|-----------|-------------|-------------|----|-------|--------------------------------------------------------|
| GO:0065008 | 0.0001704 | 2.20801097  | 21.83607875 | 38 | 3261  | regulation of biological quality                       |
| GO:1902652 | 0.0001751 | 8.028914348 | 0.823623945 | 6  | 123   | secondary alcohol metabolic process                    |
| GO:1901652 | 0.0001819 | 3.620259598 | 4.024373912 | 13 | 601   | response to peptide                                    |
| GO:0071285 | 0.000185  | 32.73932253 | 0.113834204 | 3  | 17    | cellular response to lithium ion                       |
| GO:0072521 | 0.000191  | 3.822184665 | 3.5020758   | 12 | 523   | purine-containing compound metabolic process           |
| GO:0009636 | 0.0001914 | 6.454191033 | 1.191911075 | 7  | 178   | response to toxic substance                            |
| GO:0016101 | 0.0001967 | 10.35719298 | 0.535690371 | 5  | 80    | diterpenoid metabolic process                          |
| GO:0016125 | 0.0002367 | 7.572065889 | 0.870496853 | 6  | 130   | sterol metabolic process                               |
| GO:0019400 | 0.0002611 | 28.64304124 | 0.127226463 | 3  | 19    | alditol metabolic process                              |
| GO:0019401 | 0.000264  | 151.3469388 | 0.026784519 | 2  | 4     | alditol biosynthetic process                           |
| GO:0009719 | 0.0002654 | 2.534377387 | 10.62675773 | 23 | 1587  | response to endogenous stimulus                        |
| GO:0015909 | 0.0002707 | 14.33236434 | 0.314718093 | 4  | 47    | long-chain fatty acid transport                        |
| GO:0033273 | 0.000276  | 9.586094867 | 0.575867149 | 5  | 86    | response to vitamin                                    |
| GO:0046474 | 0.0002763 | 6.05955335  | 1.265568501 | 7  | 189   | glycerophospholipid biosynthetic process               |
| GO:0019395 | 0.0003072 | 9.353836398 | 0.589259408 | 5  | 88    | fatty acid oxidation                                   |
| GO:0034440 | 0.0003411 | 9.13250774  | 0.602651667 | 5  | 90    | lipid oxidation                                        |
| GO:0002021 | 0.000355  | 25.45704467 | 0.140618722 | 3  | 21    | response to dietary excess                             |
| GO:0006721 | 0.000359  | 9.025703794 | 0.609347797 | 5  | 91    | terpenoid metabolic process                            |
| GO:0044699 | 0.0003677 | 3.49870801  | 81.82670416 | 94 | 12220 | single-organism process                                |
| GO:0055581 | 0.0004004 | 12.83506944 | 0.348198741 | 4  | 52    | anion homeostasis                                      |
| GO:0010891 | 0.0004381 | 100.8911565 | 0.033480648 | 2  | 5     | negative regulation of sequestering of triglyceride    |
| GO:0033591 | 0.0004381 | 100.8911565 | 0.033480648 | 2  | 5     | response to L-ascorbic acid                            |
| GO:0035634 | 0.0004381 | 100.8911565 | 0.033480648 | 2  | 5     | response to stilbenoid                                 |
| GO:0036155 | 0.0004381 | 100.8911565 | 0.033480648 | 2  | 5     | acylglycerol acyl-chain remodeling                     |
| GO:1901564 | 0.0004916 | 2.305094085 | 13.31190572 | 26 | 1988  | organonitrogen compound metabolic process              |
| GO:0097506 | 0.0004968 | 12.07761438 | 0.36828713  | 4  | 55    | regulation of plasma lipoprotein particle levels       |
| GO:0015850 | 0.0005213 | 5.424916574 | 1.406187224 | 7  | 210   | organic hydroxy compound transport                     |
| GO:0006805 | 0.0005279 | 6.46617755  | 1.011115575 | 6  | 151   | xenobiotic metabolic process                           |
| GO:0042592 | 0.0005343 | 2.489743386 | 9.722780233 | 21 | 1452  | homeostatic process                                    |
| GO:0046942 | 0.0005527 | 4.690499195 | 1.861524039 | 8  | 278   | carboxylic acid transport                              |
| GO:0033993 | 0.0005732 | 3.044164428 | 5.135931432 | 14 | 767   | response to lipid                                      |
| GO:0010033 | 0.0005845 | 2.13318121  | 18.16659971 | 32 | 2713  | response to organic substance                          |
| GO:0071466 | 0.0005857 | 6.333812536 | 1.031203964 | 6  | 154   | cellular response to xenobiotic stimulus               |
| GO:0015849 | 0.0005931 | 4.637999681 | 1.881612428 | 8  | 281   | organic acid transport                                 |
| GO:0010226 | 0.000602  | 20.82286785 | 0.167403241 | 3  | 25    | response to lithium ion                                |
| GO:0046320 | 0.000602  | 20.82286785 | 0.167403241 | 3  | 25    | regulation of fatty acid oxidation                     |
| GO:0008654 | 0.0006335 | 5.241577061 | 1.453060131 | 7  | 217   | phospholipid biosynthetic process                      |
| GO:0010890 | 0.0006543 | 75.66326531 | 0.040176778 | 2  | 6     | positive regulation of sequestering of triglyceride    |
| GO:0060159 | 0.0006543 | 75.66326531 | 0.040176778 | 2  | 6     | regulation of dopamine receptor signaling pathway      |
| GO:0014070 | 0.0006764 | 2.989738296 | 5.222981117 | 14 | 780   | response to organic cyclic compound                    |
| GO:0006869 | 0.0007127 | 4.503481355 | 1.935181465 | 8  | 289   | lipid transport                                        |
| GO:0009410 | 0.0007161 | 6.084553744 | 1.071380742 | 6  | 160   | response to xenobiotic stimulus                        |
| GO:0046128 | 0.0007795 | 4.439054157 | 1.961965984 | 8  | 293   | purine ribonucleoside metabolic process                |
| GO:0045834 | 0.0007868 | 7.527337762 | 0.723182001 | 5  | 108   | positive regulation of lipid metabolic process         |
| GO:0042278 | 0.0008327 | 4.391908213 | 1.982054373 | 8  | 296   | purine nucleoside metabolic process                    |
| GO:0006654 | 0.0008451 | 18.32041237 | 0.18749163  | 3  | 28    | phosphatidic acid biosynthetic process                 |
| GO:0046473 | 0.0008451 | 18.32041237 | 0.18749163  | 3  | 28    | phosphatidic acid metabolic process                    |
| GO:0098754 | 0.0008451 | 18.32041237 | 0.18749163  | 3  | 28    | detoxification                                         |
| GO:0051262 | 0.0008549 | 7.382957393 | 0.73657426  | 5  | 110   | protein tetramerization                                |
| GO:0006720 | 0.0008905 | 7.312810328 | 0.74327039  | 5  | 111   | isoprenoid metabolic process                           |
| GO:0010886 | 0.0009121 | 60.52653061 | 0.046872907 | 2  | 7     | positive regulation of cholesterol storage             |
| GO:0042758 | 0.0009121 | 60.52653061 | 0.046872907 | 2  | 7     | long-chain fatty acid catabolic process                |
| GO:0044539 | 0.0009121 | 60.52653061 | 0.046872907 | 2  | 7     | long-chain fatty acid import                           |
| GO:0046322 | 0.0009121 | 60.52653061 | 0.046872907 | 2  | 7     | negative regulation of fatty acid oxidation            |
| GO:0055098 | 0.0009121 | 60.52653061 | 0.046872907 | 2  | 7     | response to low-density lipoprotein particle           |
| GO:0006096 | 0.0009924 | 9.927419355 | 0.441944556 | 4  | 66    | glycolytic process                                     |
| GO:0034284 | 0.0010123 | 5.674661509 | 1.145038168 | 6  | 171   | response to monosaccharide                             |
| GO:0006820 | 0.0010226 | 3.316208866 | 3.642694523 | 11 | 544   | anion transport                                        |
| GO:0006757 | 0.0010501 | 9.769179894 | 0.448640686 | 4  | 67    | ATP generation from ADP                                |
| GO:0046890 | 0.0010855 | 6.981033665 | 0.776751038 | 5  | 116   | regulation of lipid biosynthetic process               |
| GO:0009119 | 0.0012171 | 4.128445581 | 2.102584706 | 8  | 314   | ribonucleoside metabolic process                       |
| GO:0006898 | 0.001228  | 4.655822854 | 1.627159502 | 7  | 243   | receptor-mediated endocytosis                          |
| GO:1901575 | 0.0012374 | 2.273812321 | 11.10887907 | 22 | 1659  | organic substance catabolic process                    |
| GO:1903523 | 0.0012549 | 15.78919303 | 0.214276148 | 3  | 32    | negative regulation of blood circulation               |
| GO:0030301 | 0.0013043 | 9.183457711 | 0.475425204 | 4  | 71    | cholesterol transport                                  |
| GO:0005975 | 0.0013513 | 2.767836984 | 5.611356636 | 14 | 838   | carbohydrate metabolic process                         |
| GO:0090407 | 0.0013673 | 3.191803645 | 3.776617115 | 11 | 564   | organophosphate biosynthetic process                   |
| GO:0015918 | 0.001374  | 9.047794118 | 0.482121334 | 4  | 72    | sterol transport                                       |
| GO:0034637 | 0.001374  | 9.047794118 | 0.482121334 | 4  | 72    | cellular carbohydrate biosynthetic process             |
| GO:0006163 | 0.0013969 | 3.395744681 | 3.214142226 | 10 | 480   | purine nucleotide metabolic process                    |
| GO:0048545 | 0.0014145 | 3.662890955 | 2.671755725 | 9  | 399   | response to steroid hormone                            |
| GO:0015908 | 0.0014462 | 8.916062802 | 0.488817464 | 4  | 73    | fatty acid transport                                   |
| GO:0044282 | 0.0015143 | 3.982169798 | 2.176242132 | 8  | 325   | small molecule catabolic process                       |
| GO:0006107 | 0.0015499 | 43.22740525 | 0.060265167 | 2  | 9     | oxaloacetate metabolic process                         |
| GO:0006600 | 0.0015499 | 43.22740525 | 0.060265167 | 2  | 9     | creatine metabolic process                             |
| GO:0050896 | 0.0015705 | 1.874247789 | 49.87277354 | 65 | 7448  | response to stimulus                                   |
| GO:0042493 | 0.0015944 | 3.596562128 | 2.718628633 | 9  | 406   | response to drug                                       |
| GO:0046031 | 0.0015986 | 8.663732394 | 0.502209723 | 4  | 75    | ADP metabolic process                                  |
| GO:0019217 | 0.0016789 | 8.542824074 | 0.508905852 | 4  | 76    | regulation of fatty acid metabolic process             |
| GO:0044723 | 0.0016831 | 2.942507264 | 4.479710727 | 12 | 669   | single-organism carbohydrate metabolic process         |
| GO:0009743 | 0.0017363 | 5.082099907 | 1.272264631 | 6  | 190   | response to carbohydrate                               |
| GO:0055086 | 0.0017695 | 2.92387567  | 4.506495246 | 12 | 673   | nucleobase-containing small molecule metabolic process |
| GO:0033500 | 0.0018308 | 5.02676733  | 1.28565689  | 6  | 192   | carbohydrate homeostasis                               |
| GO:0042593 | 0.0018308 | 5.02676733  | 1.28565689  | 6  | 192   | glucose homeostasis                                    |
| GO:0044724 | 0.0018616 | 6.143692565 | 0.877192982 | 5  | 131   | single-organism carbohydrate catabolic process         |
| GO:0009116 | 0.0019016 | 3.833751817 | 2.256595688 | 8  | 337   | nucleoside metabolic process                           |
| GO:0032371 | 0.0019189 | 13.46270467 | 0.247756797 | 3  | 37    | regulation of sterol transport                         |
| GO:0032374 | 0.0019189 | 13.46270467 | 0.247756797 | 3  | 37    | regulation of cholesterol transport                    |
| GO:0046173 | 0.0019189 | 13.46270467 | 0.247756797 | 3  | 37    | polyol biosynthetic process                            |
| GO:0055091 | 0.0019289 | 37.82142857 | 0.066961296 | 2  | 10    | phospholipid homeostasis                               |
| GO:0060100 | 0.0019289 | 37.82142857 | 0.066961296 | 2  | 10    | positive regulation of phagocytosis, engulfment        |

|            |           |             |             |    |       |                                                                                    |
|------------|-----------|-------------|-------------|----|-------|------------------------------------------------------------------------------------|
| GO:0009064 | 0.0020279 | 8.091008772 | 0.535690371 | 4  | 80    | fatty acid catabolic process                                                       |
| GO:0006732 | 0.0020733 | 13.07717231 | 0.254452926 | 3  | 38    | NADH metabolic process                                                             |
| GO:0006633 | 0.0021237 | 5.953036437 | 0.903977501 | 5  | 135   | fatty acid biosynthetic process                                                    |
| GO:0032868 | 0.0021427 | 3.436276976 | 2.839158966 | 9  | 424   | response to insulin                                                                |
| GO:0015718 | 0.0021933 | 5.907191643 | 0.910673631 | 5  | 136   | monocarboxylic acid transport                                                      |
| GO:0006165 | 0.0022199 | 7.882478632 | 0.54908263  | 4  | 82    | nucleoside diphosphate phosphorylation                                             |
| GO:0009056 | 0.0022982 | 2.06466214  | 13.97482255 | 25 | 2087  | catabolic process                                                                  |
| GO:0006768 | 0.0023473 | 33.61678005 | 0.073657426 | 2  | 11    | biotin metabolic process                                                           |
| GO:0034370 | 0.0023473 | 33.61678005 | 0.073657426 | 2  | 11    | triglyceride-rich lipoprotein particle remodeling                                  |
| GO:0034372 | 0.0023473 | 33.61678005 | 0.073657426 | 2  | 11    | very-low-density lipoprotein particle remodeling                                   |
| GO:0042953 | 0.0023473 | 33.61678005 | 0.073657426 | 2  | 11    | lipoprotein transport                                                              |
| GO:0044872 | 0.0023473 | 33.61678005 | 0.073657426 | 2  | 11    | lipoprotein localization                                                           |
| GO:0016052 | 0.0024118 | 5.773762765 | 0.93076202  | 5  | 139   | carbohydrate catabolic process                                                     |
| GO:0008202 | 0.0025314 | 4.075428708 | 1.84813178  | 7  | 276   | steroid metabolic process                                                          |
| GO:0060420 | 0.0025822 | 12.0423223  | 0.274541315 | 3  | 41    | regulation of heart growth                                                         |
| GO:1901657 | 0.0027173 | 3.609069391 | 2.39051828  | 8  | 357   | glycosyl compound metabolic process                                                |
| GO:0046939 | 0.0027542 | 7.405120482 | 0.582563278 | 4  | 87    | nucleotide phosphorylation                                                         |
| GO:0032096 | 0.0028045 | 30.25306122 | 0.080353556 | 2  | 12    | negative regulation of response to food                                            |
| GO:0032099 | 0.0028045 | 30.25306122 | 0.080353556 | 2  | 12    | negative regulation of appetite                                                    |
| GO:0060099 | 0.0028045 | 30.25306122 | 0.080353556 | 2  | 12    | regulation of phagocytosis, engulfment                                             |
| GO:0009135 | 0.0032404 | 7.062739464 | 0.609347797 | 4  | 91    | purine nucleoside diphosphate metabolic process                                    |
| GO:0009179 | 0.0032404 | 7.062739464 | 0.609347797 | 4  | 91    | purine ribonucleoside diphosphate metabolic process                                |
| GO:0006000 | 0.0033    | 27.50092764 | 0.087049685 | 2  | 13    | fructose metabolic process                                                         |
| GO:0010745 | 0.0033    | 27.50092764 | 0.087049685 | 2  | 13    | negative regulation of macrophage derived foam cell differentiation                |
| GO:0016024 | 0.0033    | 27.50092764 | 0.087049685 | 2  | 13    | CDP-diacylglycerol biosynthetic process                                            |
| GO:0045821 | 0.0033    | 27.50092764 | 0.087049685 | 2  | 13    | positive regulation of glycolytic process                                          |
| GO:0046339 | 0.0033    | 27.50092764 | 0.087049685 | 2  | 13    | diacylglycerol metabolic process                                                   |
| GO:0050746 | 0.0033    | 27.50092764 | 0.087049685 | 2  | 13    | regulation of lipoprotein metabolic process                                        |
| GO:0055094 | 0.0033    | 27.50092764 | 0.087049685 | 2  | 13    | response to lipoprotein particle                                                   |
| GO:0048639 | 0.0033501 | 5.331760436 | 1.004419446 | 5  | 150   | positive regulation of developmental growth                                        |
| GO:0010038 | 0.0034593 | 3.842407093 | 1.955269854 | 7  | 292   | response to metal ion                                                              |
| GO:0009185 | 0.0035042 | 6.903089888 | 0.622740056 | 4  | 93    | ribonucleoside diphosphate metabolic process                                       |
| GO:0097194 | 0.0035042 | 6.903089888 | 0.622740056 | 4  | 93    | execution phase of apoptosis                                                       |
| GO:0009150 | 0.0036353 | 3.161318681 | 3.073523503 | 9  | 459   | purine ribonucleotide metabolic process                                            |
| GO:0034754 | 0.0036414 | 6.825925926 | 0.629436186 | 4  | 94    | cellular hormone metabolic process                                                 |
| GO:0044763 | 0.0037224 | 2.117036155 | 74.4475693  | 86 | 11118 | single-organism cellular process                                                   |
| GO:0010744 | 0.0038332 | 25.20748299 | 0.093745815 | 2  | 14    | positive regulation of macrophage derived foam cell differentiation                |
| GO:0034389 | 0.0038332 | 25.20748299 | 0.093745815 | 2  | 14    | lipid particle organization                                                        |
| GO:0046341 | 0.0038332 | 25.20748299 | 0.093745815 | 2  | 14    | CDP-diacylglycerol metabolic process                                               |
| GO:0046459 | 0.0038332 | 25.20748299 | 0.093745815 | 2  | 14    | short-chain fatty acid metabolic process                                           |
| GO:0051194 | 0.0038332 | 25.20748299 | 0.093745815 | 2  | 14    | positive regulation of cofactor metabolic process                                  |
| GO:0051197 | 0.0038332 | 25.20748299 | 0.093745815 | 2  | 14    | positive regulation of coenzyme metabolic process                                  |
| GO:0070887 | 0.0040643 | 1.906685237 | 17.01486541 | 28 | 2541  | cellular response to chemical stimulus                                             |
| GO:0072329 | 0.0040748 | 6.604390681 | 0.649524575 | 4  | 97    | monocarboxylic acid catabolic process                                              |
| GO:0030813 | 0.0044037 | 23.26687598 | 0.100441945 | 2  | 15    | positive regulation of nucleotide catabolic process                                |
| GO:0009259 | 0.0044229 | 3.062949981 | 3.167269318 | 9  | 473   | ribonucleotide metabolic process                                                   |
| GO:0008217 | 0.0048928 | 4.857663025 | 1.09816526  | 5  | 164   | regulation of blood pressure                                                       |
| GO:0010888 | 0.0050109 | 21.60349854 | 0.107138074 | 2  | 16    | negative regulation of lipid storage                                               |
| GO:0033134 | 0.0050109 | 21.60349854 | 0.107138074 | 2  | 16    | response to hydroperoxide                                                          |
| GO:0033539 | 0.0050109 | 21.60349854 | 0.107138074 | 2  | 16    | fatty acid beta-oxidation using acyl-CoA dehydrogenase                             |
| GO:0042136 | 0.0050109 | 21.60349854 | 0.107138074 | 2  | 16    | neurotransmitter biosynthetic process                                              |
| GO:0046500 | 0.0050109 | 21.60349854 | 0.107138074 | 2  | 16    | S-adenosylmethionine metabolic process                                             |
| GO:0019693 | 0.0051307 | 2.989728167 | 3.240926744 | 9  | 484   | ribose phosphate metabolic process                                                 |
| GO:0019751 | 0.0053983 | 6.077970297 | 0.703093612 | 4  | 105   | polyol metabolic process                                                           |
| GO:1901605 | 0.0054936 | 3.98254228  | 1.607071113 | 6  | 240   | alpha-amino acid metabolic process                                                 |
| GO:0034383 | 0.0056544 | 20.16190476 | 0.113834204 | 2  | 17    | low-density lipoprotein particle clearance                                         |
| GO:0042180 | 0.0059449 | 3.914536027 | 1.633855631 | 6  | 244   | cellular ketone metabolic process                                                  |
| GO:0007584 | 0.0061174 | 4.594611529 | 1.158430427 | 5  | 173   | response to nutrient                                                               |
| GO:0030258 | 0.0061174 | 4.594611529 | 1.158430427 | 5  | 173   | lipid modification                                                                 |
| GO:0042445 | 0.0061174 | 4.594611529 | 1.158430427 | 5  | 173   | hormone metabolic process                                                          |
| GO:0032095 | 0.0063336 | 18.9005102  | 0.120530333 | 2  | 18    | regulation of response to food                                                     |
| GO:0035357 | 0.0063336 | 18.9005102  | 0.120530333 | 2  | 18    | peroxisome proliferator activated receptor signaling pathway                       |
| GO:0009132 | 0.0063566 | 5.789308176 | 0.73657426  | 4  | 110   | nucleoside diphosphate metabolic process                                           |
| GO:0010676 | 0.0065615 | 8.465063001 | 0.381679389 | 3  | 57    | positive regulation of cellular carbohydrate metabolic process                     |
| GO:0045444 | 0.0065696 | 4.513080948 | 1.178518816 | 5  | 176   | fat cell differentiation                                                           |
| GO:0006127 | 0.0066961 | Inf         | 0.00669613  | 1  | 1     | glycerophosphate shuttle                                                           |
| GO:0009757 | 0.0066961 | Inf         | 0.00669613  | 1  | 1     | hexose mediated signaling                                                          |
| GO:0010182 | 0.0066961 | Inf         | 0.00669613  | 1  | 1     | sugar mediated signaling pathway                                                   |
| GO:0010255 | 0.0066961 | Inf         | 0.00669613  | 1  | 1     | glucose mediated signaling pathway                                                 |
| GO:0014843 | 0.0066961 | Inf         | 0.00669613  | 1  | 1     | growth factor dependent regulation of skeletal muscle satellite cell proliferation |
| GO:0018917 | 0.0066961 | Inf         | 0.00669613  | 1  | 1     | fluorene metabolic process                                                         |
| GO:0034633 | 0.0066961 | Inf         | 0.00669613  | 1  | 1     | retinol transport                                                                  |
| GO:0038129 | 0.0066961 | Inf         | 0.00669613  | 1  | 1     | ERBB3 signaling pathway                                                            |
| GO:0038133 | 0.0066961 | Inf         | 0.00669613  | 1  | 1     | ERBB2-ERBB3 signaling pathway                                                      |
| GO:0042413 | 0.0066961 | Inf         | 0.00669613  | 1  | 1     | carnitine catabolic process                                                        |
| GO:0042443 | 0.0066961 | Inf         | 0.00669613  | 1  | 1     | phenylethylamine metabolic process                                                 |
| GO:0042941 | 0.0066961 | Inf         | 0.00669613  | 1  | 1     | D-alanine transport                                                                |
| GO:0046327 | 0.0066961 | Inf         | 0.00669613  | 1  | 1     | glycerol biosynthetic process from pyruvate                                        |
| GO:0046359 | 0.0066961 | Inf         | 0.00669613  | 1  | 1     | butyrate catabolic process                                                         |
| GO:0070292 | 0.0066961 | Inf         | 0.00669613  | 1  | 1     | N-acylphosphatidylethanolamine metabolic process                                   |
| GO:0071298 | 0.0066961 | Inf         | 0.00669613  | 1  | 1     | cellular response to L-ascorbic acid                                               |
| GO:0072564 | 0.0066961 | Inf         | 0.00669613  | 1  | 1     | blood microparticle formation                                                      |
| GO:1901558 | 0.0066961 | Inf         | 0.00669613  | 1  | 1     | response to metformin                                                              |
| GO:1903280 | 0.0066961 | Inf         | 0.00669613  | 1  | 1     | negative regulation of calcium:sodium antiporter activity                          |
| GO:2000230 | 0.0066961 | Inf         | 0.00669613  | 1  | 1     | negative regulation of pancreatic stellate cell proliferation                      |
| GO:2000332 | 0.0066961 | Inf         | 0.00669613  | 1  | 1     | regulation of blood microparticle formation                                        |
| GO:2000334 | 0.0066961 | Inf         | 0.00669613  | 1  | 1     | positive regulation of blood microparticle formation                               |
| GO:2000485 | 0.0066961 | Inf         | 0.00669613  | 1  | 1     | regulation of glutamine transport                                                  |

|            |           |             |             |    |     |                                                            |
|------------|-----------|-------------|-------------|----|-----|------------------------------------------------------------|
| GO:2000486 | 0.0066961 | Inf         | 0.00669613  | 1  | 1   | negative regulation of glutamine transport                 |
| GO:0033189 | 0.007048  | 17.78751501 | 0.127226463 | 2  | 19  | response to vitamin A                                      |
| GO:0010565 | 0.0072085 | 4.408721805 | 1.205303335 | 5  | 180 | regulation of cellular ketone metabolic process            |
| GO:0045471 | 0.0074219 | 5.526651652 | 0.770054908 | 4  | 115 | response to ethanol                                        |
| GO:0019674 | 0.0075639 | 8.017905589 | 0.401767778 | 3  | 60  | NAD metabolic process                                      |
| GO:0019362 | 0.0076482 | 5.476934524 | 0.776751038 | 4  | 116 | pyridine nucleotide metabolic process                      |
| GO:0046496 | 0.0076482 | 5.476934524 | 0.776751038 | 4  | 116 | nicotinamide nucleotide metabolic process                  |
| GO:0045922 | 0.0077971 | 16.79818594 | 0.133922593 | 2  | 20  | negative regulation of fatty acid metabolic process        |
| GO:0060419 | 0.0082797 | 7.745063778 | 0.415160037 | 3  | 62  | heart growth                                               |
| GO:0009117 | 0.0083616 | 2.599780702 | 4.138208116 | 10 | 618 | nucleotide metabolic process                               |
| GO:0042744 | 0.0085805 | 15.91299678 | 0.140618722 | 2  | 21  | hydrogen peroxide catabolic process                        |
| GO:0045979 | 0.0085805 | 15.91299678 | 0.140618722 | 2  | 21  | positive regulation of nucleoside metabolic process        |
| GO:1903580 | 0.0085805 | 15.91299678 | 0.140618722 | 2  | 21  | positive regulation of ATP metabolic process               |
| GO:0048638 | 0.0086166 | 3.606135576 | 1.767778224 | 6  | 264 | regulation of developmental growth                         |
| GO:0006635 | 0.008652  | 7.615463918 | 0.421856167 | 3  | 63  | fatty acid beta-oxidation                                  |
| GO:0003012 | 0.0087083 | 3.208665402 | 2.323556984 | 7  | 347 | muscle system process                                      |
| GO:0046034 | 0.0088024 | 4.190503432 | 1.265568501 | 5  | 189 | ATP metabolic process                                      |
| GO:0031667 | 0.0088231 | 2.577669023 | 4.171688764 | 10 | 623 | response to nutrient levels                                |
| GO:0071248 | 0.008848  | 5.241096866 | 0.810231686 | 4  | 121 | cellular response to metal ion                             |
| GO:1990267 | 0.008848  | 5.241096866 | 0.810231686 | 4  | 121 | response to transition metal nanoparticle                  |
| GO:0006753 | 0.0089177 | 2.573289902 | 4.178384894 | 10 | 624 | nucleoside phosphate metabolic process                     |
| GO:0010035 | 0.0089955 | 2.919833789 | 2.926208651 | 8  | 437 | response to inorganic substance                            |
| GO:0072524 | 0.0091018 | 5.196327684 | 0.816927816 | 4  | 122 | pyridine-containing compound metabolic process             |
| GO:0045981 | 0.0093604 | 5.152310924 | 0.823623945 | 4  | 123 | positive regulation of nucleotide metabolic process        |
| GO:1900544 | 0.0093604 | 5.152310924 | 0.823623945 | 4  | 123 | positive regulation of purine nucleotide metabolic process |
| GO:0019430 | 0.0093976 | 15.11632653 | 0.147314852 | 2  | 22  | removal of superoxide radicals                             |
| GO:0032098 | 0.0093976 | 15.11632653 | 0.147314852 | 2  | 22  | regulation of appetite                                     |
| GO:0045822 | 0.0093976 | 15.11632653 | 0.147314852 | 2  | 22  | negative regulation of heart contraction                   |
| GO:1900117 | 0.0093976 | 15.11632653 | 0.147314852 | 2  | 22  | regulation of execution phase of apoptosis                 |
